# Supplementary material for: Emotional responses to state repression predict collective climate action intentions
Source: Springer Nature journal article supplement (doi:10.1038/s41558-026-02570-8), 2026-02-24
Supplement: MOESM1 [file 41558_2026_2570_MOESM1_ESM.pdf]

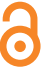

---

# **Emotional responses to state repression predict collective climate action intentions**

---

In the format provided by the authors and unedited

# Supplementary Information: Emotional Responses to State Repression Predict Collective Climate Action Intentions

Sunniva Davies-Rommetveit\*<sup>1</sup>

Jenny Douch<sup>2</sup>

Peter Gardner<sup>3</sup>

Anna Aretha Sach<sup>4</sup>

Laura Thomas-Walters<sup>5</sup>

Nicole Tausch<sup>1</sup>

## **Affiliations:**

<sup>1</sup> *School of Psychology and Neuroscience, University of St Andrews*, <sup>2</sup>*Independent Researcher*, <sup>3</sup> *Department of Sociology, University of York*, <sup>4</sup>*Department of Social Psychology, Faculty of Social and Behavioural Sciences, University of Amsterdam*,

<sup>5</sup>*ProVeg International*

\*Corresponding author: [sd458@st-andrews.ac.uk](mailto:sd458@st-andrews.ac.uk)

# Hypotheses

**Table 1: Overview of hypotheses, pre-registration, and hypotheses confirmation**

| SIMCA Variables (Model 2, controlling for past event participation) |                                                                                                      |                 |            |
|---------------------------------------------------------------------|------------------------------------------------------------------------------------------------------|-----------------|------------|
| Hypothesis                                                          |                                                                                                      | Pre-registered? | Confirmed? |
| <b>H1</b>                                                           | Environmental concern positively predicts normative collective action intentions                     | Yes             | Yes        |
| <b>H2</b>                                                           | Environmental movement identification positively predicts normative collective action intentions     | Yes             | Yes        |
| <b>H3</b>                                                           | Environmental concern positively predicts non-normative collective action intentions                 | Yes             | No         |
| <b>H4</b>                                                           | Environmental movement identification positively predicts non-normative collective action intentions | Yes             | Yes        |
| <b>H5</b>                                                           | Political efficacy positively predicts normative action intentions                                   | No              | No         |
| <b>H6</b>                                                           | Identity consolidation efficacy positively predicts normative action intentions                      | No              | Yes        |
| <b>H7</b>                                                           | Participative efficacy positively predicts normative action intentions                               | No              | Yes        |
| <b>H8</b>                                                           | Political efficacy negatively predicts non-normative action intentions                               | Yes             | No         |
| <b>H9</b>                                                           | Identity consolidation efficacy negatively predicts non-normative action intentions                  | Yes             | No         |
| <b>H10</b>                                                          | Participative efficacy negatively predicts non-normative action intentions                           | Yes             | No         |

**Anticipated and experienced repression effects  
(Model 3, controlling for past participation and SIMCA variables)**

| Hypothesis  |                                                                                                        | Pre-registered? | Confirmed? |
|-------------|--------------------------------------------------------------------------------------------------------|-----------------|------------|
| <b>H11a</b> | Anticipated repression negatively predicts future normative action tendencies (deterrent effect)       | Alternative     | No         |
| <b>H11b</b> | Anticipated repression positively predicts future normative action tendencies (galvanizing effect)     | Alternative     | No         |
| <b>H12a</b> | Experienced repression negatively predicts future normative action tendencies (deterrent effect)       | No              | Yes        |
| <b>H12b</b> | Experienced repression positively predicts future normative action tendencies (galvanizing effect)     | No              | No         |
| <b>H13a</b> | Anticipated repression negatively predicts future non-normative action tendencies (deterrent effect)   | Alternative     | No         |
| <b>H13b</b> | Anticipated repression positively predicts future non-normative action tendencies (galvanizing effect) | Alternative     | No         |
| <b>H14a</b> | Experienced repression negatively predicts future non-normative action tendencies (deterrent effect)   | No              | No         |
| <b>H14b</b> | Experienced repression positively predicts future non-normative action tendencies (galvanizing effect) | No              | Yes        |

**Emotional responses to government repression  
(Model 4, controlling for past participation, SIMCA variables, and anticipated and experienced repression)**

| Hypothesis |                                                                          | Pre-registered? | Confirmed? |
|------------|--------------------------------------------------------------------------|-----------------|------------|
| <b>H15</b> | Anger/outrage positively predicts normative collective action intentions | Yes             | Yes        |
| <b>H16</b> | Contempt positively predicts non-normative collective action intentions  | Yes             | Yes        |
| <b>H17</b> | Fear negatively predicts normative collective action intentions          | Yes             | No         |
| <b>H18</b> | Fear negatively predicts non-normative collective action intentions      | Yes             | Yes        |

**Indirect effects of anticipated and experienced repression via emotion  
(Mediation analyses, controlling for all other variables)**

| <b>Hypothesis</b> |                                                                                                      | <b>Pre-registered?</b> | <b>Confirmed?</b> |
|-------------------|------------------------------------------------------------------------------------------------------|------------------------|-------------------|
| <b>H19</b>        | A positive indirect effect of anticipated repression on normative action tendencies via anger        | No                     | Yes               |
| <b>H20</b>        | A positive indirect effect of experienced repression on normative action tendencies via anger        | No                     | No                |
| <b>H21</b>        | A positive indirect effect of anticipated repression on non-normative action tendencies via contempt | No                     | Yes               |
| <b>H22</b>        | A positive indirect effect of experienced repression on non-normative action tendencies via contempt | No                     | No                |
| <b>H23</b>        | A negative indirect effect of anticipated repression on normative action tendencies via fear         | No                     | No                |
| <b>H24</b>        | A negative indirect effect of experienced repression on normative action tendencies via fear         | No                     | No                |
| <b>H25</b>        | A negative indirect effect of anticipated repression on non-normative action tendencies via fear     | No                     | Yes               |
| <b>H26</b>        | A negative indirect effect of experienced repression on non-normative action tendencies via fear     | No                     | No                |

## Supplementary Methods

### *Sample Demographics*

The majority of respondents had been on the Extinction Rebellion UK mailing list for over three years ( $N = 857$ ), with large numbers indicating they were retired ( $N = 607$ ), white ( $N = 1270$ ), held a Bachelor's degree ( $N = 490$ ), were in the £20,000 or less ( $N = 506$ ) or £20,000-£40,000 ( $N = 439$ ) pay bracket and were from the South West ( $N = 292$ ), the South East ( $N = 249$ ) and Greater London area ( $N = 200$ ). See below for a full breakdown of demographic results:

| <b>Age bracket</b> | <b>Ns</b> |
|--------------------|-----------|
| 18-30              | 52        |
| 31-40              | 79        |
| 41-50              | 170       |
| 51-60              | 290       |
| 61-70              | 435       |
| >70                | 329       |

| <b>Gender</b>           | <b>Ns</b> |
|-------------------------|-----------|
| Male                    | 563       |
| Female                  | 751       |
| Non-binary              | 28        |
| Prefer to self-describe | 16        |
| Missing                 | 17        |

| <b>Area of UK</b>  | <b>Ns</b> |
|--------------------|-----------|
| South West         | 292       |
| South East         | 249       |
| Greater London     | 200       |
| East of England    | 91        |
| West Midlands      | 86        |
| East Midlands      | 88        |
| Yorkshire & Humber | 56        |

|                       |     |
|-----------------------|-----|
| North West            | 103 |
| North East            | 27  |
| Scotland              | 70  |
| Wales                 | 66  |
| Northern Ireland      | 5   |
| I live outside the UK | 35  |
| Missing               | 7   |

| <b>Ethnicity</b>                      | <b>Ns</b> |
|---------------------------------------|-----------|
| Asian/Asian British                   | 10        |
| Black/African/Caribbean/Black British | 5         |
| White                                 | 1270      |
| Mixed/Multiple ethnic groups          | 39        |
| Other ethnic group or background      | 19        |
| Missing                               | 32        |

| <b>Highest level of education</b>                   | <b>Ns</b> |
|-----------------------------------------------------|-----------|
| No formal education                                 | 2         |
| Some primary education                              | 2         |
| Some secondary education                            | 4         |
| Completed secondary education                       | 52        |
| Vocational qualification                            | 57        |
| Currently in college or university                  | 14        |
| Some college or university education, but no degree | 178       |
| Bachelor's degree                                   | 490       |
| Master's degree                                     | 384       |
| Doctorate or other advanced degree                  | 181       |
| Missing                                             | 11        |

## Demographic Comparisons of Current Sample to Known Extinction Rebellion UK Demographics

**Table 2: Highest educational qualification from three samples, Extinction Rebellion UK activists at protests in 2019 and 2023, compared with the current sample**

| Highest educational qualification | 2019 Protests | 2023 The Big One | 2025 - XR UK Mailing List Survey |
|-----------------------------------|---------------|------------------|----------------------------------|
| GCSE, equivalent or lower         | 2.4           | 7.4              | 4.1                              |
| A Level or equivalent             | 7.1           | 8.0              | 1.0                              |
| HND                               | 3.3           | 2.0              | 4.2                              |
| Degree or equivalent              | 51.2          | 47.8             | 49.0                             |
| Higher degree (MA/MSc, PhD)       | 34.6          | 34.8             | 41.4                             |
| Other                             | 1.4           | (not reported)   | 0.3                              |
| Total (N)                         | 232           | 299              | 1364                             |

Note. Combined % in the 2019 sample is derived from two Extinction Rebellion UK protests in April 2019 and October 2019<sup>1</sup>. 2023 data consists of protesters who spent 2 or more days at The Big One protest<sup>2</sup>.

**Table 3: Comparisons of Extinction Rebellion UK activist ethnicity**

| Ethnicity (%)                         | 2019 Protests | 2023 The Big One | 2025 - XR UK Mailing List Survey |
|---------------------------------------|---------------|------------------|----------------------------------|
| White                                 | 90.3          | 89.4             | 92.4                             |
| Black/African/Caribbean/Black British | 0.4           | 0.4              | 0.4                              |
| Asian/Asian British                   | 1             | 2.7              | 0.7                              |
| Mixed/Multiple ethnic groups          | 2.7           | 7.5              | 2.8                              |
| Other ethnic group or background      | 0.9           | -                | 1.4                              |
| Did not state ethnicity               | 4.7           | -                | 2.3                              |

Note. Combined % in the 2019 sample is derived from two Extinction Rebellion UK protests in April 2019 and October 2019<sup>1</sup>. 2023 data consists of protesters who spent 2 or more days at The Big One protest<sup>2</sup>.

**Table 4: Comparisons of Extinction Rebellion UK activist gender**

| Gender                  | 2019 Protests |      | 2023 – The Big One | 2025 - XR UK Mailing List Survey |
|-------------------------|---------------|------|--------------------|----------------------------------|
|                         | Apr %         | Oct% | %                  | %                                |
| Female                  | 64.5          | 56.8 | 56                 | 55.3                             |
| Male                    | 35.5          | 43.2 | 40                 | 41.5                             |
| Non-binary              | -             | -    | 4                  | 2.1                              |
| Prefer to self-describe | -             | -    | -                  | 1.2                              |

Note. The 2019 sample is made up of two Extinction Rebellion UK protests which took place in April 2019 and October 2019<sup>1</sup>. 2023 data consists of protesters who spent 2 or more days at The Big One protest<sup>2</sup>.

**Table 5: Comparisons of Extinction Rebellion UK activist age**

| Age bracket | 2019 Protests |       |            | 2023 The Big One |          |            |          |           | 2025 - XR UK Mailing List Survey |      |
|-------------|---------------|-------|------------|------------------|----------|------------|----------|-----------|----------------------------------|------|
|             | Apr %         | Oct % | Combined % | Age bracket      | Friday % | Saturday % | Sunday % | 2+ days % | Age bracket                      | %    |
| Under 25    | 24.2          | 16.6  | 19.7       | Under 24         | 9.8      | 11.0       | 0        | 12.2      | 18–24                            | 1.3  |
| 25–35       | 20.2          | 23.4  | 22.1       | 25–34            | 19.6     | 24.2       | 20       | 16.0      | 25–34                            | 5.2  |
| 36–45       | 16.1          | 18.3  | 17.4       | 35–44            | 12.7     | 20.3       | 40       | 13.2      | 35–44                            | 8.3  |
| 46–55       | 16.1          | 18.9  | 17.7       | 45–54            | 18.6     | 14.3       | 20       | 14.7      | 45–54                            | 14.0 |
| 56–64       | 14.5          | 15.4  | 15.1       | 55–64            | 21.6     | 17.6       | 20       | 27.2      | 55–64                            | 27.2 |
| 65+         | 8.9           | 7.4   | 8.0        | 65+              | 17.6     | 12.6       | 0        | 16.7      | 65+                              | 43.9 |
| Total (n)   | 124           | 175   | 299        |                  | 101      | 182        | 5        | 298       |                                  | 1355 |

Note. The 2019 sample is made up of two Extinction Rebellion UK protests which took place in April 2019 and October 2019<sup>1</sup>. 2023 data consists of protesters who spent 2 or more days at The Big One protest<sup>2</sup>.

For area of residence of 2023 in-situ protesters, see Figure 18 in ref.<sup>2</sup>

## Results supplementary materials

Please note that all supplementary Tables are based on a convenience sample (N=1,375) of climate activists subscribed to the Extinction Rebellion UK email list.

**Table 6: Means, standard deviations and correlations of key variables**

| Variable                            | M    | SD   | 1      | 2      | 3      | 4      | 5      | 6      | 7      | 8      | 9      | 10     | 11     | 12     |
|-------------------------------------|------|------|--------|--------|--------|--------|--------|--------|--------|--------|--------|--------|--------|--------|
| 1. Past Event Participation         | 1.9  | 0.71 | —      |        |        |        |        |        |        |        |        |        |        |        |
| 2. Environmental Concern            | 4.8  | 0.43 | .16*** | —      |        |        |        |        |        |        |        |        |        |        |
| 3. Social Identification            | 4.3  | 0.77 | .33*** | .21*** | —      |        |        |        |        |        |        |        |        |        |
| 4. Political Efficacy               | 2.5  | 0.67 | 0.05   | 0.03   | .09*** | —      |        |        |        |        |        |        |        |        |
| 5. Identity Consolidation Efficacy  | 3.1  | 0.75 | .22*** | .09*** | .19*** | .61*** | —      |        |        |        |        |        |        |        |
| 6. Participative Efficacy           | 2.6  | 0.9  | .22*** | .08**  | .22*** | .31*** | .29*** | —      |        |        |        |        |        |        |
| 7. Anticipated Repression           | 4.1  | 0.72 | -0.02  | .11*** | .08**  | 0.04   | .07*   | 0.01   | —      |        |        |        |        |        |
| 8. Experienced Repression           | 0.55 | 0.83 | .39*** | .08**  | .23*** | -0.02  | 0.01   | .15*** | 0.04   | —      |        |        |        |        |
| 9. Anger/Outrage                    | 4    | 0.99 | .19*** | .32*** | .25*** | .08**  | .18*** | .11*** | .29*** | .08**  | —      |        |        |        |
| 10. Contempt                        | 3.4  | 1.32 | .09**  | .16*** | .12*** | 0.04   | .10*** | .06*   | .24*** | .07**  | .62*** | —      |        |        |
| 11. Fear                            | 2.9  | 1.17 | .07**  | .19*** | 0.05   | .05*   | .06*   | 0.03   | .25*** | -0.03  | .46*** | .39*** | —      |        |
| 12. Normative Collective Action     | 4.1  | 0.75 | .32*** | .15*** | .23*** | .17*** | .26*** | .20*** | 0.05   | .08**  | .28*** | .17*** | .14*** | —      |
| 13. Non-normative Collection Action | 2.3  | 0.9  | .35*** | .11*** | .23*** | .11*** | .18*** | .23*** | .06*   | .41*** | .21*** | .20*** | 0      | .36*** |

Note. Means can take a value between 1 and 5, with 5 indicating more of the property described. \*  $p < .05$ , \*\*  $p < .01$ , \*\*\*  $p < .001$ .

### **Moderation Analysis: Environmental Movement Identification as a Moderator of Experienced Repression and Collective Action Intentions**

Two moderation analyses using the SPSS PROCESS macro (Model 1) were run to test whether the effect of experienced repression on normative and non-normative collective action intentions was moderated by environmental movement identification. Results for environmental movement identification as a moderator of experienced repression was non-significant for both normative ( $\beta = -0.03$ ,  $SE = 0.04$ ,  $p = 0.36$ , 95%  $CI [-0.1, 0.06]$ ) and non-normative ( $\beta = -0.02$ ,  $SE = 0.04$ ,  $p = 0.68$ , 95%  $CI [-0.1, 0.04]$ ) collective action intentions.

Note: we did not measure non-normative, violent action intentions, therefore regression analyses on contempt predicting increasingly non-normative, violent action intentions were not possible here.

## Mediation Model: Anticipated Repression

Please note for hierarchical regression analyses: unless otherwise stated (e.g. removal of one of the below variables for robustness checks), all hierarchical regressions are based on past event participation (1-5), environmental concern (1-5), environmental movement identification (1-5), political efficacy (1-5), identity consolidation efficacy (1-5), participative efficacy (1-5), anticipated repression (1-5), experienced repression (1-4), anger/outrage (1-5), contempt (1-5) and fear (1-5) based on normative (1-5) and non-normative (1-5) collective climate action intentions. Model 1 represents: past event participation; Model 2: past event participation, environmental concern, environmental movement identification, political efficacy, identity consolidation efficacy, participative efficacy; Model 3: past event participation, environmental concern, environmental movement identification, political efficacy, identity consolidation efficacy, participative efficacy, anticipated repression, experienced repression; Model 4: past event participation, environmental concern, environmental movement identification, political efficacy, identity consolidation efficacy, participative efficacy, anticipated repression, experienced repression, anger/outrage, contempt, fear. This is based on a convenience sample of N=1,375 climate activists who subscribed to the Extinction Rebellion UK mailing list. Model 4 explains an additional variance ( $R^2$ ) of 0.07 ( $F$ -change 12.92,  $p < 0.001$ ) for normative and 0.14 ( $F$ -change 14.88,  $p < 0.001$ ) for non-normative collective action intentions.

Please note for mediation analyses: unless otherwise stated (e.g. removal of one of the below variables for robustness checks) mediation analysis for anticipated repression (1-5) on normative (1-5) and non-normative (1-5) collective action intentions were via the following emotions: fear (1-5), anger/outrage (1-5) and contempt (1-5). Covariates (unless removed based on Reviewer checks) include: past event participation (1-5), environmental concern (1-5), environmental movement identification (1-5), political efficacy (1-5), identity consolidation efficacy (1-5), participative efficacy (1-5) and experienced repression (1-4). This is based on a convenience sample of N=1,375 climate activists who subscribed to the Extinction Rebellion UK mailing list. Numbers represent standardized coefficients.  $***P < 0.001$ ,  $**P < 0.01$   $*P < 0.05$ . The same is true for mediation for experienced repression on normative and non-normative collective actions, controlling for anticipated repression instead of experienced repression and all other variables listed above.

**Table 7: Mediation Analysis for Anticipated Repression (IV) on Normative Collective Action Intentions (DV)**

| Path in <i>Process</i> model | (a) Effect of IV on mediator | (b) Effect of mediator on DV | (c) Indirect effect of IV on DV via mediator | (d) Effect of IV on DV |
|------------------------------|------------------------------|------------------------------|----------------------------------------------|------------------------|
| Mediator                     |                              |                              |                                              |                        |
| Anger/Outrage                | <b>0.26***</b> [0.28, 0.41]  | <b>0.17***</b> [0.07, 0.18]  | <b>0.04</b> [0.02, 0.06]                     |                        |
| Contempt                     | <b>0.22***</b> [0.3, 0.5]    | 0.01 [-0.03, 0.04]           | 0.002 [-0.01, 0.02]                          |                        |
| Fear                         | <b>0.24***</b> [0.3, 0.47]   | 0.01 [-0.03, 0.04]           | 0.002 [-0.01, 0.02]                          | -0.01 [-0.07, 0.04]    |

Note. The coefficients are standardised. \*  $p < 0.05$ , \*\*  $p < 0.01$ , \*\*\*  $p < 0.001$ . Covariates include past event participation, environmental concern, environmental movement identification, political efficacy, identity consolidation efficacy and participative efficacy, and experienced repression.

**Table 8: Mediation Analysis for Anticipated Repression (IV) on Non-Normative Collective Action Intentions (DV)**

| Path in <i>Process</i> model | (a) Effect of IV on mediator | (b) Effect of mediator on DV ( ) | (c) Indirect effect of IV on DV via mediator | (d) Effect of IV on DV |
|------------------------------|------------------------------|----------------------------------|----------------------------------------------|------------------------|
| Mediator                     |                              |                                  |                                              |                        |
| Anger/Outrage                | <b>0.26***</b> [0.28, 0.4]   | <b>0.09*</b> [0.02, 0.14]        | <b>0.02</b> [0.004, 0.04]                    |                        |
| Contempt                     | <b>0.22***</b> [0.3, 0.5]    | <b>0.12***</b> [0.04, 0.12]      | <b>0.03</b> [0.01, 0.04]                     |                        |
| Fear                         | <b>0.24***</b> [0.3, 0.47]   | <b>-0.1***</b> [-0.12, -0.04]    | <b>-0.03</b> [-0.04, -0.01]                  | 0.01 [-0.05, 0.07]     |

Note. The coefficients are standardised. \*  $p < 0.05$ , \*\*  $p < 0.01$ , \*\*\*  $p < 0.001$ . Covariates include past event participation, environmental concern, environmental movement identification, political, identity consolidation and participative efficacy, and experienced repression.

## Mediation Model: Experienced Repression

**Table 9: Mediation Analysis for Experienced Repression (IV) and Normative Collective Action (DV)**

| Path in <i>Process</i> model | (a) Effect of IV on mediator | (b) Effect of mediator on DV | (c) Indirect effect of IV on DV via mediator | (d) Effect of IV on DV     |
|------------------------------|------------------------------|------------------------------|----------------------------------------------|----------------------------|
| Mediator                     |                              |                              |                                              |                            |
| Anger/Outrage                | -0.03 [-0.09, 0.03]          | <b>0.17***</b> [0.07, 0.18]  | -0.04 [-0.02, 0.01]                          |                            |
| Contempt                     | 0.03 [-0.05, 0.13]           | 0.01 [-0.03, 0.04]           | 0.0002 [-0.002, 0.003]                       |                            |
| Fear                         | <b>-0.07*</b> [-0.18, -0.02] | 0.01 [-0.03, 0.04]           | -0.0006 [-0.01, 0.004]                       |                            |
|                              |                              |                              |                                              | <b>-0.05</b> [-0.1, 0.003] |

Note. The coefficients are standardised. \*  $p < 0.05$ , \*\*  $p < 0.01$ , \*\*\*  $p < 0.001$ . Covariates include past event participation, environmental concern, environmental movement identification, political, identity consolidation, participative efficacy and anticipated repression.

**Table 10: Mediation Analysis for Experienced Repression (IV) and Non-Normative Collective Action (DV)**

| Path in <i>Process</i> model | (a) Effect of IV on mediator | (b) Effect of mediator on DV  | (c) Indirect effect of IV on DV via mediator | (d) Effect of IV on DV   |
|------------------------------|------------------------------|-------------------------------|----------------------------------------------|--------------------------|
| Mediator                     |                              |                               |                                              |                          |
| Anger/Outrage                | -0.03 [-0.09, 0.03]          | <b>0.09*</b> [0.02, 0.14]     | -0.002 [-0.01, 0.003]                        |                          |
| Contempt                     | 0.03 [-0.05, 0.13]           | <b>0.12***</b> [0.04, 0.12]   | 0.003 [-0.004, 0.01]                         |                          |
| Fear                         | <b>-0.07*</b> [-0.18, -0.02] | <b>-0.1***</b> [-0.12, -0.04] | <b>0.01</b> [0.001, 0.02]                    |                          |
|                              |                              |                               |                                              | <b>0.32</b> [0.27, 0.38] |

Note. The coefficients are standardised. \*  $p < 0.05$ , \*\*  $p < 0.01$ , \*\*\*  $p < 0.001$ . Covariates include past event participation, environmental concern, environmental movement identification, political efficacy, identity consolidation efficacy, participative efficacy and anticipated repression.

## Robustness Checks

### Workplace strike item

The removal of a workplace strike was not pre-registered. Originally, we included this item to capture a wide array of potential actions that Extinction Rebellion UK activists might have taken part in. However, we decided to remove this item for two reasons. The first was the low inter-item correlations (e.g.  $r=0.08$ ), and the second was the fact that many activists (55.8%) were either extremely or somewhat unlikely to participate in a future workplace strike compared with other normative collective actions<sup>3</sup>. The low intentions for this item reflects the fact that holding a workplace strike to ensure your company (as opposed to states) takes measures to reduce its carbon footprint is relatively uncommon and undocumented as a climate action<sup>3</sup>. We therefore decided that including this item was not reflective of the repertoire of normative climate actions, and removed it from the measure.

**Table 11: Hierarchical Multiple Regression Predicting Normative Action Intentions with Workplace Strike Item included in Model**

| Normative actions<br>Variable   | Model 1        |                  | Model 2       |                 | Model 3       |                 | Model 4        |                 |       |                 |      |                 |
|---------------------------------|----------------|------------------|---------------|-----------------|---------------|-----------------|----------------|-----------------|-------|-----------------|------|-----------------|
|                                 | B              | SE (B) $\beta$   | B             | SE (B) $\beta$  | B             | SE (B) $\beta$  | B              | SE (B) $\beta$  |       |                 |      |                 |
| (Constant)                      | <b>3.18***</b> | 0.05             | <b>1.8***</b> | 0.22            | <b>1.7***</b> | 0.24            | <b>1.9***</b>  | 0.23            |       |                 |      |                 |
| Past Event Participation        | <b>0.35***</b> | 0.03             | 0.34          | <b>0.27***</b>  | 0.03          | 0.26            | <b>0.28***</b> | 0.03            | 0.28  | <b>0.26***</b>  | 0.03 | 0.25            |
| Environmental Concern           |                |                  |               | <b>0.12**</b>   | 0.04          | 0.07            | <b>0.12**</b>  | 0.04            | 0.07  | 0.04            | 0.05 | 0.02            |
| Environmental Movement ID       |                |                  |               | <b>0.06*</b>    | 0.03          | 0.07            | <b>0.06*</b>   | 0.03            | 0.07  | 0.04            | 0.03 | 0.05            |
| Political Efficacy              |                |                  |               | 0.05            | 0.04          | 0.05            | 0.05           | 0.04            | 0.05  | 0.06            | 0.04 | 0.05            |
| Identity Consolidation Efficacy |                |                  |               | <b>0.14***</b>  | 0.03          | 0.14            | <b>0.13***</b> | 0.03            | 0.14  | <b>0.11***</b>  | 0.03 | 0.12            |
| Participative Efficacy          |                |                  |               | <b>0.05*</b>    | 0.02          | 0.06            | <b>0.05*</b>   | 0.02            | 0.06  | <b>0.05*</b>    | 0.02 | 0.06            |
| Anticipated Repression          |                |                  |               |                 |               |                 | 0.03           | 0.03            | 0.03  | -0.03           | 0.03 | -0.03           |
| Experienced Repression          |                |                  |               |                 |               |                 | -0.03          | 0.03            | -0.03 | -0.02           | 0.02 | -0.03           |
| Anger/Outrage                   |                |                  |               |                 |               |                 |                |                 |       | <b>0.14***</b>  | 0.03 | 0.18            |
| Contempt                        |                |                  |               |                 |               |                 |                |                 |       | 0.02            | 0.02 | 0.03            |
| Fear                            |                |                  |               |                 |               |                 |                |                 |       | 0.01            | 0.02 | 0.01            |
| R <sup>2</sup>                  |                | 0.12             |               | 0.17            |               | 0.17            |                | 0.17            |       | 0.2             |      | 0.2             |
| F                               |                | <b>171.64***</b> |               | <b>44.33***</b> |               | <b>33.57***</b> |                | <b>33.57***</b> |       | <b>30.39***</b> |      | <b>30.39***</b> |
| $\Delta R^2$                    |                | 0.12             |               | 0.05            |               | 0.002           |                | 0.002           |       | 0.03            |      | 0.03            |
| $\Delta F$                      |                | <b>171.64***</b> |               | <b>16.78***</b> |               | 1.25            |                | 1.25            |       | <b>18.31***</b> |      | <b>18.31***</b> |

Note. \*  $p < .05$ , \*\*  $p < .01$ , \*\*\*  $p < .001$ .

**Table 12: Mediation Analysis for Anticipated Repression (IV) and Normative Action Intentions (DV) when Workplace Strike Included in Model**

| Path in Process<br>model | (a) Effect of IV ( ) on<br>mediator | (b) Effect of<br>mediator on DV | (c) Indirect effect of<br>IV on DV via<br>mediator | (d) Effect of IV on<br>DV |
|--------------------------|-------------------------------------|---------------------------------|----------------------------------------------------|---------------------------|
| Mediator                 |                                     |                                 |                                                    |                           |
| Anger/Outrage            | <b>0.26***</b> [0.28, 0.41]         | <b>0.18***</b> [0.08, 0.19]     | <b>0.05</b> [0.03, 0.07]                           |                           |
| Contempt                 | <b>0.22***</b> [0.3, 0.5]           | 0.03 [-0.02, 0.05]              | 0.006 [-0.01, 0.02]                                |                           |
| Fear                     | <b>0.24***</b> [0.3, 0.47]          | 0.01 [-0.03, 0.04]              | 0.003 [-0.01, 0.02]                                | -0.03 [-0.08, 0.03]       |

Note. The coefficients are standardised. \*  $p < 0.05$ , \*\*  $p < 0.01$ , \*\*\*  $p < 0.001$ . Covariates include past event participation, environmental concern, environmental movement identification, political efficacy, identity consolidation efficacy and participative efficacy, and experienced repression.

**Table 13: Mediation Analysis for Experienced Repression (IV) and Normative Action Intentions (DV) when Workplace Strike Included in Model**

| Path in <i>Process</i> model | (a) Effect of IV ( ) on mediator | (b) Effect of mediator on DV | (c) Indirect effect of IV on DV via mediator | (d) Effect of IV on DV |
|------------------------------|----------------------------------|------------------------------|----------------------------------------------|------------------------|
| Mediator                     |                                  |                              |                                              |                        |
| Anger/Outrage                | -0.03 [-0.09, 0.03]              | <b>0.18***</b> [0.08, 0.19]  | -0.005 [-0.02, 0.005]                        |                        |
| Contempt                     | 0.03 [-0.05, 0.13]               | 0.03 [-0.02, 0.05]           | 0.0007 [-0.002, 0.005]                       |                        |
| Fear                         | <b>-0.07*</b> [-0.18, -0.02]     | 0.01 [-0.03, 0.04]           | -0.001 [-0.006, 0.003]                       | -0.02 [-0.07, 0.02]    |

Note. The coefficients are standardised. \*  $p < 0.05$ , \*\*  $p < 0.01$ , \*\*\*  $p < 0.001$ . Covariates include past event participation, environmental concern, environmental movement identification, political efficacy, identity consolidation efficacy and participative efficacy, and anticipated repression.

## Removal of moderately correlated variables testing for results stability

### Contempt and Anger/Outrage

**Table 14: Hierarchical Multiple Regression Predicting Action Intentions with Anger / Outrage excluded from the Model**

| Normative actions<br>Variable   | Model 1        |                  | Model 2        |                 | Model 3        |                 | Model 4        |                 |       |                |      |       |
|---------------------------------|----------------|------------------|----------------|-----------------|----------------|-----------------|----------------|-----------------|-------|----------------|------|-------|
|                                 | B              | SE (B) β         | B              | SE (B) β        | B              | SE (B) β        | B              | SE (B) β        |       |                |      |       |
| (Constant)                      | <b>3.49***</b> | 0.06             | <b>2.04***</b> | 0.23            | <b>1.92***</b> | 0.25            | <b>1.97***</b> | 0.25            |       |                |      |       |
| Past Event Participation        | <b>0.35***</b> | 0.03             | 0.33           | <b>0.26***</b>  | 0.03           | 0.24            | <b>0.28***</b> | 0.03            | 0.26  | <b>0.27***</b> | 0.03 | 0.26  |
| Environmental Concern           |                |                  |                | <b>0.13**</b>   | 0.05           | 0.07            | <b>0.12**</b>  | 0.05            | 0.07  | <b>0.09</b>    | 0.05 | 0.05  |
| Environmental Movement ID       |                |                  |                | <b>0.08**</b>   | 0.03           | 0.08            | <b>0.08**</b>  | 0.03            | 0.08  | <b>0.08**</b>  | 0.03 | 0.08  |
| Political Efficacy              |                |                  |                | 0.05            | 0.04           | 0.05            | 0.05           | 0.04            | 0.05  | 0.05           | 0.04 | 0.05  |
| Identity Consolidation Efficacy |                |                  |                | <b>0.13***</b>  | 0.03           | 0.13            | <b>0.13***</b> | 0.03            | 0.13  | <b>0.12***</b> | 0.03 | 0.12  |
| Participative Efficacy          |                |                  |                | 0.06*           | 0.02           | 0.07            | <b>0.06**</b>  | 0.02            | 0.07  | <b>0.06*</b>   | 0.02 | 0.07  |
| Anticipated Repression          |                |                  |                |                 |                |                 | 0.04           | 0.03            | 0.03  | 0.04           | 0.03 | 0.04  |
| Experienced Repression          |                |                  |                |                 |                |                 | <b>-0.05*</b>  | 0.03            | -0.06 | <b>-0.05*</b>  | 0.03 | -0.06 |
| Contempt                        |                |                  |                |                 |                |                 |                |                 |       | <b>0.05**</b>  | 0.02 | 0.09  |
| Fear                            |                |                  |                |                 |                |                 |                |                 |       | 0.03           | 0.02 | 0.05  |
| R <sup>2</sup>                  |                | 0.11             |                | 0.16            |                | 0.16            |                | 0.17            |       |                |      |       |
| F                               |                | <b>153.87***</b> |                | <b>41.43***</b> |                | <b>31.83***</b> |                | <b>27.47***</b> |       |                |      |       |
| ΔR <sup>2</sup>                 |                | 0.11             |                | 0.06            |                | 0.004           |                | 0.01            |       |                |      |       |
| ΔF                              |                | <b>153.87***</b> |                | <b>17.04***</b> |                | 2.72            |                | <b>8.52***</b>  |       |                |      |       |
| Non-normative actions           |                | Model 1          |                | Model 2         |                | Model 3         |                | Model 4         |       |                |      |       |
| Variable                        | B              | SE (B) β         | B              | SE (B) β        | B              | SE (B) β        | B              | SE (B) β        |       |                |      |       |
| (Constant)                      | <b>1.47***</b> | 0.07             | 0.48           | 0.27            | <b>0.54*</b>   | 0.27            | <b>0.55*</b>   | 0.27            |       |                |      |       |
| Past Event Participation        | <b>0.46***</b> | 0.03             | 0.36           | <b>0.37***</b>  | 0.04           | 0.29            | <b>0.23***</b> | 0.04            | 0.19  | <b>0.23***</b> | 0.04 | 0.19  |
| Environmental Concern           |                |                  |                | 0.04            | 0.05           | 0.02            | 0.03           | 0.05            | 0.02  | 0.02           | 0.05 | 0.01  |
| Environmental Movement ID       |                |                  |                | <b>0.1**</b>    | 0.03           | 0.09            | 0.05           | 0.03            | 0.04  | 0.04           | 0.03 | 0.03  |
| Political Efficacy              |                |                  |                | 0.03            | 0.04           | 0.02            | 0.03           | 0.04            | 0.02  | 0.04           | 0.04 | 0.03  |
| Identity Consolidation Efficacy |                |                  |                | <b>0.12***</b>  | 0.03           | 0.13            | <b>0.1***</b>  | 0.03            | 0.1   | <b>0.1***</b>  | 0.03 | 0.1   |
| Participative Efficacy          |                |                  |                | 0.06            | 0.04           | 0.05            | <b>0.1**</b>   | 0.04            | 0.09  | <b>0.09*</b>   | 0.04 | 0.07  |
| Anticipated Repression          |                |                  |                |                 |                |                 | 0.04           | 0.03            | 0.03  | 0.02           | 0.03 | 0.02  |
| Experienced Repression          |                |                  |                |                 |                |                 | <b>0.33***</b> | 0.03            | 0.31  | <b>0.32***</b> | 0.03 | 0.3   |
| Contempt                        |                |                  |                |                 |                |                 |                |                 |       | <b>0.11***</b> | 0.02 | 0.16  |
| Fear                            |                |                  |                |                 |                |                 |                |                 |       | <b>-0.07**</b> | 0.02 | -0.09 |
| R <sup>2</sup>                  |                | 0.13             |                | 0.16            |                | 0.25            |                | 0.27            |       |                |      |       |
| F                               |                | <b>198.68***</b> |                | <b>43.49***</b> |                | <b>53.7***</b>  |                | <b>47.97***</b> |       |                |      |       |
| ΔR <sup>2</sup>                 |                | 0.13             |                | 0.04            |                | 0.08            |                | 0.02            |       |                |      |       |
| ΔF                              |                | <b>198.68***</b> |                | <b>10.93***</b> |                | <b>70.36***</b> |                | <b>19.03***</b> |       |                |      |       |

Note. \* p < .05, \*\* p < .01, \*\*\* p < .001.

**Table 15: Mediation Analysis for Anticipated Repression (IV) and Normative Action Intentions (DV) when Anger / Outrage is Removed from the Model**

| Path in <i>Process</i> model | (a) Effect of IV (I) on mediator | (b) Effect of mediator on DV | (c) Indirect effect of IV on DV via mediator | (d) Effect of IV on DV |
|------------------------------|----------------------------------|------------------------------|----------------------------------------------|------------------------|
| <b>Mediator</b>              |                                  |                              |                                              |                        |
| Contempt                     | <b>0.22***</b> [0.3, 0.5]        | <b>0.09**</b> [0.02, 0.08]   | <b>0.02</b> [0.006, 0.03]                    |                        |
| Fear                         | <b>0.24***</b> [0.3, 0.47]       | 0.04 [-0.007, 0.06]          | 0.01 [-0.003, 0.02]                          | 0.004 [-0.05, 0.06]    |

Note. The coefficients are standardised. \*  $p < 0.05$ , \*\*  $p < 0.01$ , \*\*\*  $p < 0.001$ . Covariates include past event participation, environmental concern, environmental movement identification, political efficacy, identity consolidation efficacy and participative efficacy, and experienced repression.

**Table 16: Mediation Analysis for Anticipated Repression (IV) and Non-Normative Action Intentions (DV) when Anger / Outrage is Removed from the Model**

| Path in <i>Process</i> model | (a) Effect of IV (I) on mediator | (b) Effect of mediator on DV | (c) Indirect effect of IV on DV via mediator | (d) Effect of IV on DV |
|------------------------------|----------------------------------|------------------------------|----------------------------------------------|------------------------|
| <b>Mediator</b>              |                                  |                              |                                              |                        |
| Contempt                     | <b>0.22***</b> [0.3, 0.5]        | <b>0.16***</b> [0.07, 0.14]  | <b>0.03</b> [0.02, 0.05]                     |                        |
| Fear                         | <b>0.24***</b> [0.3, 0.47]       | <b>-0.09**</b> [-0.1, -0.03] | <b>-0.02</b> [-0.03, -0.007]                 | 0.02 [-0.04, 0.08]     |

Note. The coefficients are standardised. \*  $p < 0.05$ , \*\*  $p < 0.01$ , \*\*\*  $p < 0.001$ . Covariates include past event participation, environmental concern, environmental movement identification, political efficacy, identity consolidation efficacy and participative efficacy, and experienced repression.

**Table 17: Mediation Analysis for Experienced Repression (IV) and Normative Action Intentions (DV) when Anger / Outrage is Removed from the Model**

| Path in <i>Process</i> model | (a) Effect of IV (I) on mediator | (b) Effect of mediator on DV | (c) Indirect effect of IV on DV via mediator | (d) Effect of IV on DV       |
|------------------------------|----------------------------------|------------------------------|----------------------------------------------|------------------------------|
| <b>Mediator</b>              |                                  |                              |                                              |                              |
| Contempt                     | 0.03 [-0.5, 0.13]                | <b>0.09**</b> [0.02, 0.08]   | 0.002 [-0.003, 0.008]                        |                              |
| Fear                         | <b>-0.07*</b> [-0.18, -0.02]     | 0.04 [-0.007, 0.06]          | -0.003 [-0.01, 0.001]                        | <b>-0.05</b> [-0.1, -0.0003] |

Note. The coefficients are standardised. \*  $p < 0.05$ , \*\*  $p < 0.01$ , \*\*\*  $p < 0.001$ . Covariates include past event participation, environmental concern, environmental movement identification, political efficacy, identity consolidation efficacy and participative efficacy, and anticipated repression.

**Table 18: Mediation Analysis for Experienced Repression (IV) and Non-Normative Action Intentions (DV) when Anger / Outrage is Removed from the Model**

| Path in Process model | (a) Effect of IV (I) on mediator | (b) Effect of mediator on DV | (c) Indirect effect of IV on DV via mediator | (d) Effect of IV on DV   |
|-----------------------|----------------------------------|------------------------------|----------------------------------------------|--------------------------|
| Mediator              |                                  |                              |                                              |                          |
| Contempt              | 0.03 [-0.5, 0.13]                | <b>0.16***</b> [0.07, 0.14]  | 0.004 [-0.005, 0.01]                         |                          |
| Fear                  | <b>-0.07*</b> [-0.18, -0.02]     | <b>-0.09**</b> [-0.1, -0.03] | <b>0.006</b> [0.0007, 0.01]                  | <b>0.32</b> [0.27, 0.38] |

Note. The coefficients are standardised. \* p < 0.05, \*\* p < 0.01, \*\*\* p < 0.001. Covariates include past event participation, environmental concern, environmental movement identification, political efficacy, identity consolidation efficacy and participative efficacy, and anticipated repression.

**Table 19: Hierarchical Multiple Regression Predicting Action Intentions with Contempt excluded from the Model**

| Normative actions Variable      | Model 1        |                  | Model 2        |                 | Model 3        |                 | Model 4        |                 |                |                |        |       |
|---------------------------------|----------------|------------------|----------------|-----------------|----------------|-----------------|----------------|-----------------|----------------|----------------|--------|-------|
|                                 | B              | SE (B) β         | B              | SE (B) β        | B              | SE (B) β        | B              | SE (B) β        |                |                |        |       |
| (Constant)                      | <b>3.5***</b>  | 0.06             | <b>2.04***</b> | 0.23            | <b>1.91***</b> | 0.24            | <b>2.1***</b>  | 0.24            |                |                |        |       |
| Past Event Participation        | <b>0.34***</b> | 0.03             | <b>0.33</b>    | <b>0.26***</b>  | 0.03           | 0.24            | <b>0.28***</b> | 0.03            | 0.26           | <b>0.26***</b> | 0.03   | 0.24  |
| Environmental Concern           |                |                  |                | <b>0.12**</b>   | 0.05           | 0.07            | <b>0.12**</b>  | 0.05            | 0.07           | 0.04           | 0.05   | 0.02  |
| Environmental Movement ID       |                |                  |                | <b>0.08**</b>   | 0.03           | 0.08            | <b>0.08**</b>  | 0.03            | 0.09           | <b>0.07*</b>   | 0.03   | 0.07  |
| Political Efficacy              |                |                  |                | 0.05            | 0.04           | 0.05            | 0.05           | 0.04            | 0.05           | 0.06           | 0.04   | 0.05  |
| Identity Consolidation Efficacy |                |                  |                | <b>0.13***</b>  | 0.03           | 0.13            | <b>0.13***</b> | 0.03            | 0.13           | <b>0.11**</b>  | 0.03   | 0.11  |
| Participative Efficacy          |                |                  |                | <b>0.06*</b>    | 0.02           | 0.07            | <b>0.06**</b>  | 0.02            | 0.07           | <b>0.06*</b>   | 0.02   | 0.07  |
| Anticipated Repression          |                |                  |                |                 |                |                 | 0.04           | 0.03            | 0.03           | -0.01          | 0.03   | -0.01 |
| Experienced Repression          |                |                  |                |                 |                |                 | <b>-0.05*</b>  | 0.03            | -0.06          | -0.05          | 0.03   | -0.05 |
| Anger/Outrage                   |                |                  |                |                 |                |                 |                |                 |                | <b>0.13***</b> | 0.02   | 0.17  |
| Fear                            |                |                  |                |                 |                |                 |                |                 |                | 0.01           | 0.02   | 0.01  |
| R <sup>2</sup>                  |                | 0.11             |                | 0.16            |                | 0.16            |                | 0.19            |                |                |        |       |
| F                               |                | <b>156.27***</b> |                | <b>42.48***</b> |                | <b>32.68***</b> |                | <b>30.93***</b> |                |                |        |       |
| ΔR <sup>2</sup>                 |                | 0.11             |                | 0.06            |                | 0.004           |                | 0.03            |                |                |        |       |
| ΔF                              |                | <b>156.27***</b> |                | <b>17.75***</b> |                | 2.9             |                | <b>20.14***</b> |                |                |        |       |
| Non-normative actions Variable  | Model 1        |                  | Model 2        |                 | Model 3        |                 | Model 4        |                 |                |                |        |       |
|                                 | B              | SE (B) β         | B              | SE (B) β        | B              | SE (B) β        | B              | SE (B) β        |                |                |        |       |
| (Constant)                      | <b>1.46***</b> | 0.06             | 0.42           | 0.27            | 0.49           | 0.27            | <b>0.62*</b>   | 0.27            |                |                |        |       |
| Past Event Participation        | <b>0.46***</b> | 0.03             | <b>0.37***</b> | 0.03            | 0.29           | <b>0.23***</b>  | 0.04           | 0.19            | <b>0.22***</b> | 0.04           | 0.18   |       |
| Environmental Concern           |                |                  | 0.05           | 0.05            | 0.02           | 0.04            | 0.05           | 0.02            | -0.01          | 0.05           | -0.003 |       |
| Environmental Movement ID       |                |                  | <b>0.1**</b>   | 0.03            | 0.08           | 0.05            | 0.03           | 0.04            | 0.03           | 0.03           | 0.02   |       |
| Political Efficacy              |                |                  | 0.02           | 0.04            | 0.02           | 0.02            | 0.04           | 0.02            | 0.03           | 0.04           | 0.02   |       |
| Identity Consolidation Efficacy |                |                  | 0.07           | 0.04            | 0.06           | <b>0.11**</b>   | 0.04           | 0.09            | <b>0.09*</b>   | 0.04           | 0.08   |       |
| Participative Efficacy          |                |                  | <b>0.13***</b> | 0.03            | 0.13           | <b>0.1***</b>   | 0.03           | 0.1             | <b>0.1***</b>  | 0.03           | 0.1    |       |
| Anticipated Repression          |                |                  |                |                 |                | 0.04            | 0.03           | 0.03            | 0.02           | 0.03           | 0.01   |       |
| Experienced Repression          |                |                  |                |                 |                | <b>0.34***</b>  | 0.03           | 0.32            | <b>0.34***</b> | 0.03           | 0.31   |       |
| Anger/Outrage                   |                |                  |                |                 |                |                 |                |                 | <b>0.14***</b> | 0.03           | 0.15   |       |
| Fear                            |                |                  |                |                 |                |                 |                |                 | <b>-0.07**</b> | 0.02           | -0.09  |       |
| R <sup>2</sup>                  |                | 0.13             |                | 0.17            |                | 0.25            |                | 0.26            |                |                |        |       |
| F                               |                | <b>205.09***</b> |                | <b>45.21***</b> |                | <b>55.99***</b> |                | <b>48.48***</b> |                |                |        |       |
| ΔR <sup>2</sup>                 |                | 0.13             |                | 0.04            |                | 0.08            |                | 0.02            |                |                |        |       |
| ΔF                              |                | <b>205.09***</b> |                | <b>11.59***</b> |                | <b>73.41***</b> |                | <b>13.99***</b> |                |                |        |       |

Note. \* p < .05, \*\* p < .01, \*\*\* p < .001.

**Table 20: Mediation Analysis for Anticipated Repression (IV) and Normative Action Intentions (DV) when Contempt is Removed from the Model**

| Path in <i>Process</i> model | (a) Effect of IV ( ) on mediator | (b) Effect of mediator on DV | (c) Indirect effect of IV on DV via mediator | (d) Effect of IV on DV |
|------------------------------|----------------------------------|------------------------------|----------------------------------------------|------------------------|
| Mediator                     |                                  |                              |                                              |                        |
| Anger/Outrage                | <b>0.26***</b> [0.28, 0.41]      | <b>0.17***</b> [0.09, 0.18]  | <b>0.04</b> [0.03, 0.06]                     |                        |
| Fear                         | <b>0.24***</b> [0.3, 0.47]       | 0.01 [-0.03, 0.04]           | 0.003 [-0.01, 0.02]                          | -0.01 [-0.07, 0.04]    |

Note. The coefficients are standardised. \*  $p < 0.05$ , \*\*  $p < 0.01$ , \*\*\*  $p < 0.001$ . Covariates include past event participation, environmental concern, environmental movement identification, political efficacy, identity consolidation efficacy and participative efficacy, and experienced repression.

**Table 21: Mediation Analysis for Anticipated Repression (IV) and Non-Normative Action Intentions (DV) when Contempt is Removed from the Model**

| Path in <i>Process</i> model | (a) Effect of IV ( ) on mediator | (b) Effect of mediator on DV  | (c) Indirect effect of IV on DV via mediator | (d) Effect of IV on DV |
|------------------------------|----------------------------------|-------------------------------|----------------------------------------------|------------------------|
| Mediator                     |                                  |                               |                                              |                        |
| Anger/Outrage                | <b>0.26***</b> [0.28, 0.41]      | <b>0.15***</b> [0.08, 0.19]   | <b>0.04</b> [0.02, 0.06]                     |                        |
| Fear                         | <b>0.24***</b> [0.3, 0.47]       | <b>-0.09**</b> [-0.11, -0.03] | <b>-0.02</b> [-0.04, -0.007]                 | 0.02 [-0.04, 0.08]     |

Note. The coefficients are standardised. \*  $p < 0.05$ , \*\*  $p < 0.01$ , \*\*\*  $p < 0.001$ . Covariates include past event participation, environmental concern, environmental movement identification, political efficacy, identity consolidation efficacy and participative efficacy, and experienced repression.

**Table 22: Mediation Analysis for Experienced Repression (IV) and Normative Action Intentions (DV) when Contempt is Removed from the Model**

| Path in <i>Process</i> model | (a) Effect of IV ( ) on mediator | (b) Effect of mediator on DV | (c) Indirect effect of IV on DV via mediator | (d) Effect of IV on DV |
|------------------------------|----------------------------------|------------------------------|----------------------------------------------|------------------------|
| Mediator                     |                                  |                              |                                              |                        |
| Anger/Outrage                | -0.03 [-0.09, 0.03]              | <b>0.17***</b> [0.09, 0.18]  | -0.005 [-0.02, 0.005]                        |                        |
| Fear                         | <b>-0.07*</b> [-0.18, -0.02]     | 0.01 [-0.03, 0.04]           | -0.0008 [-0.007, 0.004]                      | -0.05 [-0.1, 0.001]    |

Note. The coefficients are standardised. \*  $p < 0.05$ , \*\*  $p < 0.01$ , \*\*\*  $p < 0.001$ . Covariates include past event participation, environmental concern, environmental movement identification, political efficacy, identity consolidation efficacy and participative efficacy, and anticipated repression.

**Table 23: Mediation Analysis for Experienced Repression (IV) and Non-Normative Action Intentions (DV) when Contempt is Removed from the Model**

| Path in <i>Process</i> model | (a) Effect of IV ( ) on mediator | (b) Effect of mediator on DV  | (c) Indirect effect of IV on DV via mediator | (d) Effect of IV on DV   |
|------------------------------|----------------------------------|-------------------------------|----------------------------------------------|--------------------------|
| Mediator                     |                                  |                               |                                              |                          |
| Anger/Outrage                | -0.03 [-0.09, 0.03]              | <b>0.15***</b> [0.08, 0.19]   | -0.004 [-0.01, 0.004]                        |                          |
| Fear                         | <b>-0.07**</b> [-0.19, -0.03]    | <b>-0.09**</b> [-0.11, -0.03] | <b>0.007</b> [0.008, 0.01]                   | <b>0.34</b> [0.28, 0.39] |

Note. The coefficients are standardised. \*  $p < 0.05$ , \*\*  $p < 0.01$ , \*\*\*  $p < 0.001$ . Covariates include past event participation, environmental concern, environmental movement identification, political efficacy, identity consolidation efficacy and participative efficacy, and anticipated repression.

**Table 24: Hierarchical Multiple Regression Predicting Action Intentions with Identity Consolidation Efficacy excluded from the Model**

| <b>Normative actions</b>     |                | Model 1          |      | Model 2        |                 | Model 3 |                | Model 4         |       |                 |                 |        |
|------------------------------|----------------|------------------|------|----------------|-----------------|---------|----------------|-----------------|-------|-----------------|-----------------|--------|
| Variable                     | B              | SE (B)           | β    | B              | SE (B)          | β       | B              | SE (B)          | β     |                 |                 |        |
| (Constant)                   | <b>3.49***</b> | 0.06             |      | <b>2.11***</b> | 0.23            |         | <b>1.96***</b> | 0.25            |       | <b>2.14***</b>  | 0.25            |        |
| Past Event Participation     | <b>0.35***</b> | 0.03             | 0.32 | <b>0.28***</b> | 0.03            | 0.26    | <b>0.31***</b> | 0.03            | 0.29  | <b>0.28***</b>  | 0.03            | 0.26   |
| Environmental Concern        |                |                  |      | <b>0.13**</b>  | 0.05            | 0.08    | <b>0.12**</b>  | 0.05            | 0.07  | 0.05            | 0.05            | 0.03   |
| Environmental Movement ID    |                |                  |      | <b>0.08**</b>  | 0.03            | 0.09    | <b>0.09**</b>  | 0.03            | 0.09  | <b>0.07*</b>    | 0.03            | 0.07   |
| Political Efficacy           |                |                  |      | <b>0.14***</b> | 0.03            | 0.13    | <b>0.14***</b> | 0.03            | 0.12  | <b>0.13***</b>  | 0.03            | 0.11   |
| Participative Efficacy       |                |                  |      | <b>0.06**</b>  | 0.02            | 0.07    | <b>0.07**</b>  | 0.02            | 0.08  | <b>0.06**</b>   | 0.02            | 0.07   |
| Anticipated Repression       |                |                  |      |                |                 |         | 0.04           | 0.03            | 0.04  | -0.01           | 0.03            | -0.01  |
| Experienced Repression       |                |                  |      |                |                 |         | <b>-0.06*</b>  | 0.03            | -0.07 | <b>-0.06*</b>   | 0.03            | -0.06  |
| Anger/Outrage                |                |                  |      |                |                 |         |                |                 |       | <b>0.13***</b>  | 0.03            | 0.17   |
| Contempt                     |                |                  |      |                |                 |         |                |                 |       | 0.01            | 0.02            | 0.01   |
| Fear                         |                |                  |      |                |                 |         |                |                 |       | 0.004           | 0.02            | 0.01   |
| R <sup>2</sup>               |                | 0.11             |      |                | 0.15            |         |                | 0.15            |       |                 | 0.18            |        |
| F                            |                | <b>153.22***</b> |      |                | <b>46.13***</b> |         |                | <b>34.23***</b> |       |                 | <b>28.8***</b>  |        |
| ΔR <sup>2</sup>              |                | 0.11             |      |                | 0.05            |         |                | 0.005           |       |                 | 0.03            |        |
| ΔF                           |                | <b>153.22***</b> |      |                | <b>17.43***</b> |         |                | <b>3.96*</b>    |       |                 | <b>13.77***</b> |        |
| <b>Non-normative actions</b> |                | Model 1          |      | Model 2        |                 | Model 3 |                | Model 4         |       |                 |                 |        |
| Variable                     | B              | SE (B)           | β    | B              | SE (B)          | β       | B              | SE (B)          | β     |                 |                 |        |
| (Constant)                   | <b>1.48***</b> | 0.07             |      | 0.5            | 0.27            |         | <b>0.57*</b>   | 0.27            |       | <b>0.65*</b>    | 0.27            |        |
| Past Event Participation     | <b>0.45***</b> | 0.03             | 0.36 | <b>0.37***</b> | 0.03            | 0.3     | <b>0.25***</b> | 0.03            | 0.2   | <b>0.24***</b>  | 0.03            | 0.19   |
| Environmental Concern        |                |                  |      | 0.04           | 0.05            | 0.02    | 0.04           | 0.05            | 0.02  | -0.001          | 0.05            | -0.001 |
| Environmental Movement ID    |                |                  |      | <b>0.1**</b>   | 0.03            | 0.09    | 0.06           | 0.03            | 0.05  | 0.04            | 0.03            | 0.03   |
| Political Efficacy           |                |                  |      | 0.07           | 0.04            | 0.05    | <b>0.1**</b>   | 0.03            | 0.08  | <b>0.1**</b>    | 0.03            | 0.07   |
| Participative Efficacy       |                |                  |      | <b>0.13***</b> | 0.03            | 0.13    | <b>0.1***</b>  | 0.03            | 0.1   | <b>0.1***</b>   | 0.03            | 0.1    |
| Anticipated Repression       |                |                  |      |                |                 |         | 0.04           | 0.03            | 0.03  | 0.01            | 0.03            | 0.01   |
| Experienced Repression       |                |                  |      |                |                 |         | <b>0.33***</b> | 0.03            | 0.3   | <b>0.32***</b>  | 0.03            | 0.3    |
| Anger/Outrage                |                |                  |      |                |                 |         |                |                 |       | <b>0.08**</b>   | 0.03            | 0.09   |
| Contempt                     |                |                  |      |                |                 |         |                |                 |       | <b>0.08***</b>  | 0.02            | 0.12   |
| Fear                         |                |                  |      |                |                 |         |                |                 |       | <b>-0.08***</b> | 0.02            | -0.1   |
| R <sup>2</sup>               |                | 0.13             |      |                | 0.16            |         |                | 0.24            |       |                 | 0.26            |        |
| F                            |                | <b>196.01***</b> |      |                | <b>51.14***</b> |         |                | <b>59.56***</b> |       |                 | <b>47.69***</b> |        |
| ΔR <sup>2</sup>              |                | 0.13             |      |                | 0.03            |         |                | 0.08            |       |                 | 0.03            |        |
| ΔF                           |                | <b>196.01***</b> |      |                | <b>13.1***</b>  |         |                | <b>67.48***</b> |       |                 | <b>15.38***</b> |        |

Note. \* p < .05, \*\* p < .01, \*\*\* p < .001.

**Table 25: Hierarchical Multiple Regression Predicting Action Intentions with Political Efficacy excluded from the Model**

| <b>Normative actions</b>        |                | Model 1          |         | Model 2        |                 | Model 3 |                | Model 4         |         |                 |                 |       |
|---------------------------------|----------------|------------------|---------|----------------|-----------------|---------|----------------|-----------------|---------|-----------------|-----------------|-------|
| Variable                        | B              | SE (B)           | $\beta$ | B              | SE (B)          | $\beta$ | B              | SE (B)          | $\beta$ |                 |                 |       |
| (Constant)                      | <b>3.49***</b> | 0.06             |         | <b>2.09***</b> | 0.23            |         | <b>1.96***</b> | 0.24            |         | <b>2.15***</b>  | 0.24            |       |
| Past Event Participation        | <b>0.35***</b> | 0.03             | 0.33    | <b>0.25***</b> | 0.03            | 0.24    | <b>0.28***</b> | 0.03            | 0.26    | <b>0.25***</b>  | 0.03            | 0.24  |
| Environmental Concern           |                |                  |         | <b>0.12**</b>  | 0.05            | 0.07    | <b>0.12**</b>  | 0.05            | 0.07    | 0.04            | 0.05            | 0.02  |
| Environmental Movement ID       |                |                  |         | <b>0.08**</b>  | 0.03            | 0.08    | <b>0.08**</b>  | 0.03            | 0.08    | <b>0.06*</b>    | 0.03            | 0.06  |
| Identity Consolidation Efficacy |                |                  |         | <b>0.16***</b> | 0.03            | 0.16    | <b>0.15***</b> | 0.03            | 0.15    | <b>0.14***</b>  | 0.03            | 0.14  |
| Participative Efficacy          |                |                  |         | <b>0.06**</b>  | 0.02            | 0.08    | <b>0.07**</b>  | 0.02            | 0.08    | <b>0.06**</b>   | 0.02            | 0.08  |
| Anticipated Repression          |                |                  |         |                |                 |         | 0.04           | 0.03            | 0.03    | -0.01           | 0.03            | -0.01 |
| Experienced Repression          |                |                  |         |                |                 |         | <b>-0.05*</b>  | 0.03            | -0.06   | -0.05           | 0.03            | -0.05 |
| Anger/Outrage                   |                |                  |         |                |                 |         |                |                 |         | <b>0.13***</b>  | 0.03            | 0.17  |
| Contempt                        |                |                  |         |                |                 |         |                |                 |         | 0.01            | 0.02            | 0.01  |
| Fear                            |                |                  |         |                |                 |         |                |                 |         | 0.01            | 0.02            | 0.01  |
| R <sup>2</sup>                  |                | 0.11             |         |                | 0.16            |         |                | 0.16            |         |                 | 0.18            |       |
| F                               |                | <b>153.87***</b> |         |                | <b>49.24***</b> |         |                | <b>36.05***</b> |         |                 | <b>29.79***</b> |       |
| $\Delta R^2$                    |                | 0.11             |         |                | 0.05            |         |                | 0.004           |         |                 | 0.02            |       |
| $\Delta F$                      |                | <b>153.87***</b> |         |                | <b>20.75***</b> |         |                | 2.75            |         |                 | <b>12.87***</b> |       |
| <b>Non-normative actions</b>    |                | Model 1          |         | Model 2        |                 | Model 3 |                | Model 4         |         |                 |                 |       |
| Variable                        | B              | SE (B)           | $\beta$ | B              | SE (B)          | $\beta$ | B              | SE (B)          | $\beta$ |                 |                 |       |
| (Constant)                      | <b>1.47***</b> | 0.07             |         | 0.51           | 0.27            |         | <b>0.57*</b>   | 0.27            |         | <b>0.66*</b>    | 0.27            |       |
| Past Event Participation        | <b>0.46***</b> | 0.03             | 0.36    | <b>0.36***</b> | 0.03            | 0.29    | <b>0.23***</b> | 0.04            | 0.18    | <b>0.22***</b>  | 0.04            | 0.18  |
| Environmental Concern           |                |                  |         | 0.03           | 0.05            | 0.02    | 0.03           | 0.05            | 0.02    | -0.01           | 0.05            | 0     |
| Environmental Movement ID       |                |                  |         | <b>0.1**</b>   | 0.03            | 0.08    | 0.05           | 0.03            | 0.04    | 0.03            | 0.03            | 0.03  |
| Identity Consolidation Efficacy |                |                  |         | <b>0.08*</b>   | 0.03            | 0.06    | <b>0.12***</b> | 0.03            | 0.1     | <b>0.1***</b>   | 0.03            | 0.09  |
| Participative Efficacy          |                |                  |         | <b>0.13***</b> | 0.03            | 0.13    | <b>0.1***</b>  | 0.03            | 0.1     | <b>0.1***</b>   | 0.03            | 0.1   |
| Anticipated Repression          |                |                  |         |                |                 |         | 0.04           | 0.03            | 0.03    | 0.01            | 0.03            | 0.01  |
| Experienced Repression          |                |                  |         |                |                 |         | <b>0.33***</b> | 0.03            | 0.31    | <b>0.33***</b>  | 0.03            | 0.3   |
| Anger/Outrage                   |                |                  |         |                |                 |         |                |                 |         | <b>0.08*</b>    | 0.03            | 0.09  |
| Contempt                        |                |                  |         |                |                 |         |                |                 |         | <b>0.08***</b>  | 0.02            | 0.12  |
| Fear                            |                |                  |         |                |                 |         |                |                 |         | <b>-0.08***</b> | 0.02            | -0.1  |
| R <sup>2</sup>                  |                | 0.13             |         |                | 0.16            |         |                | 0.25            |         |                 | 0.27            |       |
| F                               |                | <b>198.68***</b> |         |                | <b>52.15***</b> |         |                | <b>61.32***</b> |         |                 | <b>48.71***</b> |       |
| $\Delta R^2$                    |                | 0.13             |         |                | 0.04            |         |                | 0.08            |         |                 | 0.03            |       |
| $\Delta F$                      |                | <b>198.68***</b> |         |                | <b>13.59***</b> |         |                | <b>70.3***</b>  |         |                 | <b>14.73***</b> |       |

Note. \*  $p < .05$ , \*\*  $p < .01$ , \*\*\*  $p < .001$ .

## Removal of highly correlated variables testing for results stability

### Anger & Outrage

**Table 26: Hierarchical Multiple Regression Predicting Action Intentions with Anger excluded from the Model**

| Normative actions<br>Variable     | Model 1        |                  |         | Model 2        |                 |         | Model 3        |                 |         | Model 4         |                 |         |
|-----------------------------------|----------------|------------------|---------|----------------|-----------------|---------|----------------|-----------------|---------|-----------------|-----------------|---------|
|                                   | B              | SE (B)           | $\beta$ | B              | SE (B)          | $\beta$ | B              | SE (B)          | $\beta$ | B               | SE (B)          | $\beta$ |
| (Constant)                        | <b>3.49***</b> | 0.06             |         | <b>1.96***</b> | 0.24            |         | <b>1.83***</b> | 0.25            |         | <b>2.02***</b>  | 0.25            |         |
| Past Event Participation          | <b>0.35***</b> | 0.03             | 0.33    | <b>0.26***</b> | 0.03            | 0.24    | <b>0.28***</b> | 0.03            | 0.26    | <b>0.26***</b>  | 0.03            | 0.24    |
| Environmental Concern             |                |                  |         | <b>0.14**</b>  | 0.05            | 0.08    | <b>0.13**</b>  | 0.05            | 0.08    | 0.06            | 0.05            | 0.03    |
| Environmental Movement ID         |                |                  |         | <b>0.08**</b>  | 0.03            | 0.08    | <b>0.08**</b>  | 0.03            | 0.09    | <b>0.07*</b>    | 0.03            | 0.07    |
| Political Efficacy                |                |                  |         | 0.06           | 0.04            | 0.05    | 0.06           | 0.04            | 0.05    | 0.06            | 0.04            | 0.05    |
| Identity Consolidation Efficacy   |                |                  |         | <b>0.13***</b> | 0.03            | 0.13    | <b>0.12***</b> | 0.03            | 0.12    | <b>0.11**</b>   | 0.03            | 0.11    |
| Participative Efficacy            |                |                  |         | <b>0.06*</b>   | 0.02            | 0.07    | <b>0.06*</b>   | 0.02            | 0.07    | 0.06*           | 0.02            | 0.07    |
| Anticipated Repression            |                |                  |         |                |                 |         | 0.04           | 0.03            | 0.03    | -0.01           | 0.03            | -0.01   |
| Experienced Repression            |                |                  |         |                |                 |         | <b>-0.05*</b>  | 0.03            | -0.06   | -0.05           | 0.03            | -0.05   |
| Outrage                           |                |                  |         |                |                 |         |                |                 |         | <b>0.11***</b>  | 0.02            | 0.16    |
| Contempt                          |                |                  |         |                |                 |         |                |                 |         | 0.01            | 0.02            | 0.02    |
| Fear                              |                |                  |         |                |                 |         |                |                 |         | 0.01            | 0.02            | 0.01    |
| R <sup>2</sup>                    |                | 0.11             |         |                | 0.16            |         |                | 0.16            |         |                 | 0.19            |         |
| F                                 |                | <b>154.36***</b> |         |                | <b>42.05***</b> |         |                | <b>32.3***</b>  |         |                 | <b>27.79***</b> |         |
| $\Delta R^2$                      |                | 0.11             |         |                | 0.06            |         |                | 0.004           |         |                 | 0.03            |         |
| $\Delta F$                        |                | <b>154.36***</b> |         |                | <b>17.61***</b> |         |                | 2.72            |         |                 | <b>13.29***</b> |         |
| <hr/>                             |                |                  |         |                |                 |         |                |                 |         |                 |                 |         |
| Non-normative actions<br>Variable | Model 1        |                  |         | Model 2        |                 |         | Model 3        |                 |         | Model 4         |                 |         |
|                                   | B              | SE (B)           | $\beta$ | B              | SE (B)          | $\beta$ | B              | SE (B)          | $\beta$ | B               | SE (B)          | $\beta$ |
| (Constant)                        | <b>1.47***</b> | 0.07             |         | 0.5            | 0.28            |         | <b>0.55*</b>   | 0.28            |         | <b>0.62*</b>    | 0.28            |         |
| Past Event Participation          | <b>0.46***</b> | 0.03             | 0.36    | <b>0.37***</b> | 0.04            | 0.29    | <b>0.23***</b> | 0.04            | 0.19    | <b>0.23***</b>  | 0.04            | 0.18    |
| Environmental Concern             |                |                  |         | 0.03           | 0.05            | 0.02    | 0.03           | 0.05            | 0.02    | 0               | 0.05            | 0       |
| Environmental Movement ID         |                |                  |         | <b>0.1**</b>   | 0.03            | 0.08    | 0.05           | 0.03            | 0.04    | 0.03            | 0.03            | 0.03    |
| Political Efficacy                |                |                  |         | 0.02           | 0.04            | 0.02    | 0.03           | 0.04            | 0.02    | 0.04            | 0.04            | 0.03    |
| Identity Consolidation Efficacy   |                |                  |         | 0.06           | 0.04            | 0.05    | <b>0.1**</b>   | 0.04            | 0.09    | <b>0.08*</b>    | 0.04            | 0.07    |
| Participative Efficacy            |                |                  |         | <b>0.12***</b> | 0.03            | 0.13    | <b>0.1***</b>  | 0.03            | 0.1     | <b>0.1***</b>   | 0.03            | 0.1     |
| Anticipated Repression            |                |                  |         |                |                 |         | 0.04           | 0.03            | 0.03    | 0.01            | 0.03            | 0.01    |
| Experienced Repression            |                |                  |         |                |                 |         | <b>0.33***</b> | 0.03            | 0.31    | <b>0.32***</b>  | 0.03            | 0.3     |
| Outrage                           |                |                  |         |                |                 |         |                |                 |         | 0.05            | 0.03            | 0.06    |
| Contempt                          |                |                  |         |                |                 |         |                |                 |         | <b>0.09***</b>  | 0.02            | 0.13    |
| Fear                              |                |                  |         |                |                 |         |                |                 |         | <b>-0.07***</b> | 0.02            | -0.1    |
| R <sup>2</sup>                    |                | 0.13             |         |                | 0.16            |         |                | 0.25            |         |                 | 0.27            |         |
| F                                 |                | <b>198.14***</b> |         |                | <b>43.35***</b> |         |                | <b>53.53***</b> |         |                 | <b>43.89***</b> |         |
| $\Delta R^2$                      |                | 0.13             |         |                | 0.04            |         |                | 0.08            |         |                 | 0.02            |         |
| $\Delta F$                        |                | <b>198.14***</b> |         |                | <b>10.88***</b> |         |                | <b>70.12***</b> |         |                 | <b>13.92***</b> |         |

Note. \*  $p < .05$ , \*\*  $p < .01$ , \*\*\*  $p < .001$ .

**Table 27: Hierarchical Multiple Regression Predicting Action Intentions with Outrage excluded from the Model**

| <b>Normative actions</b>        |                |                  |      |                |                 |      |                |                 |       |                 |                 |       |
|---------------------------------|----------------|------------------|------|----------------|-----------------|------|----------------|-----------------|-------|-----------------|-----------------|-------|
| Variable                        | Model 1        |                  |      | Model 2        |                 |      | Model 3        |                 |       | Model 4         |                 |       |
|                                 | B              | SE (B)           | β    | B              | SE (B)          | β    | B              | SE (B)          | β     | B               | SE (B)          | β     |
| (Constant)                      | <b>3.5***</b>  | 0.06             |      | <b>2.06***</b> | 0.23            |      | <b>1.94***</b> | 0.25            |       | <b>2.05***</b>  | 0.24            |       |
| Past Event Participation        | <b>0.34***</b> | 0.03             | 0.32 | <b>0.26***</b> | 0.03            | 0.24 | <b>0.28***</b> | 0.03            | 0.26  | <b>0.26***</b>  | 0.03            | 0.25  |
| Environmental Concern           |                |                  |      | <b>0.12**</b>  | 0.05            | 0.07 | <b>0.12**</b>  | 0.05            | 0.07  | 0.06            | 0.05            | 0.04  |
| Environmental Movement ID       |                |                  |      | <b>0.07**</b>  | 0.03            | 0.07 | <b>0.08**</b>  | 0.03            | 0.08  | <b>0.07*</b>    | 0.03            | 0.07  |
| Political Efficacy              |                |                  |      | 0.05           | 0.04            | 0.05 | 0.05           | 0.04            | 0.05  | 0.06            | 0.04            | 0.05  |
| Identity Consolidation Efficacy |                |                  |      | <b>0.14***</b> | 0.03            | 0.14 | <b>0.13***</b> | 0.03            | 0.13  | <b>0.12***</b>  | 0.03            | 0.12  |
| Participative Efficacy          |                |                  |      | 0.06*          | 0.02            | 0.07 | <b>0.06*</b>   | 0.02            | 0.07  | <b>0.06*</b>    | 0.02            | 0.07  |
| Anticipated Repression          |                |                  |      |                |                 |      | 0.03           | 0.03            | 0.03  | -0.01           | 0.03            | -0.01 |
| Experienced Repression          |                |                  |      |                |                 |      | <b>-0.05*</b>  | 0.03            | -0.06 | -0.05           | 0.03            | -0.05 |
| Anger                           |                |                  |      |                |                 |      |                |                 |       | <b>0.08***</b>  | 0.03            | 0.11  |
| Contempt                        |                |                  |      |                |                 |      |                |                 |       | 0.02            | 0.02            | 0.04  |
| Fear                            |                |                  |      |                |                 |      |                |                 |       | 0.01            | 0.02            | 0.02  |
| R <sup>2</sup>                  |                | 0.1              |      |                | 0.16            |      |                | 0.16            |       |                 | 0.17            |       |
| F                               |                | <b>151.72***</b> |      |                | <b>41.08***</b> |      |                | <b>31.54***</b> |       |                 | <b>25.94***</b> |       |
| ΔR <sup>2</sup>                 |                | 0.11             |      |                | 0.06            |      |                | 0.003           |       |                 | 0.02            |       |
| ΔF                              |                | <b>151.72***</b> |      |                | <b>17.07***</b> |      |                | 2.61            |       |                 | <b>9.37***</b>  |       |
| <b>Non-normative actions</b>    |                |                  |      |                |                 |      |                |                 |       |                 |                 |       |
| Variable                        | Model 1        |                  |      | Model 2        |                 |      | Model 3        |                 |       | Model 4         |                 |       |
|                                 | B              | SE (B)           | β    | B              | SE (B)          | β    | B              | SE (B)          | β     | B               | SE (B)          | β     |
| (Constant)                      | <b>1.48***</b> | 0.07             |      | 0.49           | 0.27            |      | <b>0.54*</b>   | 0.27            |       | <b>0.6*</b>     | 0.27            |       |
| Past Event Participation        | <b>0.45***</b> | 0.03             | 0.36 | <b>0.37***</b> | 0.04            | 0.29 | <b>0.23***</b> | 0.04            | 0.19  | <b>0.23***</b>  | 0.04            | 0.18  |
| Environmental Concern           |                |                  |      | 0.03           | 0.05            | 0.02 | 0.03           | 0.05            | 0.02  | 0.002           | 0.05            | 0.001 |
| Environmental Movement ID       |                |                  |      | <b>0.1**</b>   | 0.03            | 0.08 | 0.05           | 0.03            | 0.04  | 0.03            | 0.03            | 0.03  |
| Political Efficacy              |                |                  |      | 0.03           | 0.04            | 0.02 | 0.03           | 0.04            | 0.02  | 0.04            | 0.04            | 0.03  |
| Identity Consolidation Efficacy |                |                  |      | 0.06           | 0.04            | 0.05 | <b>0.1**</b>   | 0.04            | 0.08  | <b>0.08*</b>    | 0.04            | 0.07  |
| Participative Efficacy          |                |                  |      | <b>0.12***</b> | 0.03            | 0.12 | <b>0.1***</b>  | 0.03            | 0.1   | <b>0.1***</b>   | 0.03            | 0.1   |
| Anticipated Repression          |                |                  |      |                |                 |      | 0.04           | 0.03            | 0.03  | 0.01            | 0.03            | 0.01  |
| Experienced Repression          |                |                  |      |                |                 |      | <b>0.33***</b> | 0.03            | 0.31  | <b>0.33***</b>  | 0.03            | 0.3   |
| Anger                           |                |                  |      |                |                 |      |                |                 |       | <b>0.07*</b>    | 0.03            | 0.08  |
| Contempt                        |                |                  |      |                |                 |      |                |                 |       | <b>0.09***</b>  | 0.02            | 0.13  |
| Fear                            |                |                  |      |                |                 |      |                |                 |       | <b>-0.08***</b> | 0.02            | -0.1  |
| R <sup>2</sup>                  |                | 0.13             |      |                | 0.16            |      |                | 0.24            |       |                 | 0.27            |       |
| F                               |                | <b>197.08***</b> |      |                | <b>43.13***</b> |      |                | <b>53.39***</b> |       |                 | <b>44.17***</b> |       |
| ΔR <sup>2</sup>                 |                | 0.13             |      |                | 0.04            |      |                | 0.08            |       |                 | 0.03            |       |
| ΔF                              |                | <b>197.08***</b> |      |                | <b>10.85***</b> |      |                | <b>70.29***</b> |       |                 | <b>14.94***</b> |       |

Note. \*  $p < .05$ , \*\*  $p < .01$ , \*\*\*  $p < .001$ .

**Table 28: Mediation Analysis for Anticipated Repression (IV) and Normative Action Intentions (DV) when Anger is Removed from the Model**

| Path in Process model | (a) Effect of IV (I) on mediator | (b) Effect of mediator on DV | (c) Indirect effect of IV on DV via mediator | (d) Effect of IV on DV |
|-----------------------|----------------------------------|------------------------------|----------------------------------------------|------------------------|
| Mediator              |                                  |                              |                                              |                        |
| Outrage               | <b>0.24***</b> [0.27, 0.42]      | <b>0.16***</b> [0.07, 0.16]  | <b>0.04</b> [0.02, 0.06]                     |                        |
| Contempt              | <b>0.22***</b> [0.3, 0.5]        | 0.02 [-0.02, 0.05]           | 0.005 [-0.008, 0.02]                         |                        |
| Fear                  | <b>0.24***</b> [0.3, 0.47]       | 0.01 [-0.03, 0.04]           | 0.003 [-0.01, 0.02]                          | -0.01 [-0.07, 0.04]    |

Note. The coefficients are standardised. \*  $p < 0.05$ , \*\*  $p < 0.01$ , \*\*\*  $p < 0.001$ . Covariates include past event participation, environmental concern, environmental movement identification, political efficacy, identity consolidation efficacy and participative efficacy, and experienced repression.

**Table 29: Mediation Analysis for Experienced Repression (IV) and Normative Action Intentions (DV) when Anger is Removed from the Model**

| Path in Process model | (a) Effect of IV (I) on mediator | (b) Effect of mediator on DV | (c) Indirect effect of IV on DV via mediator | (d) Effect of IV on DV |
|-----------------------|----------------------------------|------------------------------|----------------------------------------------|------------------------|
| Mediator              |                                  |                              |                                              |                        |
| Outrage               | -0.01 [-0.08, 0.05]              | <b>0.16***</b> [0.07, 0.16]  | -0.002 [-0.01, 0.007]                        |                        |
| Contempt              | 0.02 [-0.05, 0.13]               | 0.02 [-0.02, 0.05]           | 0.0006 [-0.017, 0.004]                       |                        |
| Fear                  | <b>-0.07*</b> [-0.18, -0.02]     | 0.01 [-0.03, 0.04]           | -0.0009 [-0.007, 0.003]                      | -0.05 [-0.1, 0.0005]   |

Note. The coefficients are standardised. \*  $p < 0.05$ , \*\*  $p < 0.01$ , \*\*\*  $p < 0.001$ . Covariates include past event participation, environmental concern, environmental movement identification, political efficacy, identity consolidation efficacy and participative efficacy, and anticipated repression.

**Table 30: Mediation Analysis for Anticipated Repression (IV) and Non-Normative Action Intentions (DV) when Anger is Removed from the Model**

| Path in Process model | (a) Effect of IV (I) on mediator | (b) Effect of mediator on DV | (c) Indirect effect of IV on DV via mediator | (d) Effect of IV on DV |
|-----------------------|----------------------------------|------------------------------|----------------------------------------------|------------------------|
| Mediator              |                                  |                              |                                              |                        |
| Outrage               | <b>0.24***</b> [0.28, 0.42]      | <b>0.16***</b> [0.07, 0.16]  | <b>0.04</b> [0.02, 0.06]                     |                        |
| Contempt              | <b>0.22***</b> [0.3, 0.5]        | 0.02 [-0.02, 0.05]           | 0.005 [-0.008, 0.02]                         |                        |
| Fear                  | <b>-0.24***</b> [0.3, 0.47]      | 0.01 [-0.03, 0.04]           | 0.003 [-0.01, 0.017]                         | -0.01 [-0.07, 0.04]    |

Note. The coefficients are standardised. \*  $p < 0.05$ , \*\*  $p < 0.01$ , \*\*\*  $p < 0.001$ . Covariates include past event participation, environmental concern, environmental movement identification, political efficacy, identity consolidation efficacy and participative efficacy, and experienced repression.

**Table 31: Mediation Analysis for Experienced Repression (IV) and Non-Normative Action Intentions (DV) when Anger is Removed from the Model**

| Path in Process model | (a) Effect of IV (I) on mediator | (b) Effect of mediator on DV | (c) Indirect effect of IV on DV via mediator | (d) Effect of IV on DV |
|-----------------------|----------------------------------|------------------------------|----------------------------------------------|------------------------|
| Mediator              |                                  |                              |                                              |                        |
| Outrage               | -0.01 [-0.08, 0.05]              | <b>0.16***</b> [0.07, 0.16]  | -0.002 [-0.01, 0.007]                        |                        |
| Contempt              | 0.02 [-0.05, 0.13]               | 0.02 [-0.02, 0.05]           | 0.0006 [-0.002, 0.004]                       |                        |
| Fear                  | <b>-0.07*</b> [-0.18, -0.02]     | 0.01 [-0.03, 0.04]           | 0.0009 [-0.007, 0.004]                       | -0.05 [-0.1, 0.0005]   |

Note. The coefficients are standardised. \*  $p < 0.05$ , \*\*  $p < 0.01$ , \*\*\*  $p < 0.001$ . Covariates include past event participation, environmental concern, environmental movement identification, political efficacy, identity consolidation efficacy and participative efficacy, and anticipated repression.

**Table 32: Mediation Analysis for Anticipated Repression (IV) and Normative Action Intentions (DV) when Outrage is Removed from the Model**

| Path in Process model | (a) Effect of IV (I) on mediator | (b) Effect of mediator on DV | (c) Indirect effect of IV on DV via mediator | (d) Effect of IV on DV |
|-----------------------|----------------------------------|------------------------------|----------------------------------------------|------------------------|
| Mediator              |                                  |                              |                                              |                        |
| Anger                 | <b>0.24***</b> [0.28, 0.42]      | <b>0.11**</b> [0.03, 0.13]   | <b>0.03</b> [0.01, 0.05]                     |                        |
| Contempt              | <b>0.22***</b> [0.3, 0.49]       | 0.04 [-0.01, 0.06]           | 0.008 [-0.005, 0.02]                         |                        |
| Fear                  | <b>0.24***</b> [0.3, 0.47]       | 0.02 [-0.02, 0.05]           | 0.004 [-0.01, 0.02]                          | -0.009 [-0.06, 0.05]   |

Note. The coefficients are standardised. \*  $p < 0.05$ , \*\*  $p < 0.01$ , \*\*\*  $p < 0.001$ . Covariates include past event participation, environmental concern, environmental movement identification, political efficacy, identity consolidation efficacy and participative efficacy, and experienced repression.

**Table 33: Mediation Analysis for Anticipated Repression (IV) and Non-Normative Action Intentions (DV) when Outrage is Removed from the Model**

| Path in Process model | (a) Effect of IV (I) on mediator | (b) Effect of mediator on DV  | (c) Indirect effect of IV on DV via mediator | (d) Effect of IV on DV |
|-----------------------|----------------------------------|-------------------------------|----------------------------------------------|------------------------|
| Mediator              |                                  |                               |                                              |                        |
| Anger                 | <b>0.24***</b> [0.28, 0.42]      | <b>0.08*</b> [0.01, 0.12]     | <b>0.02</b> [0.004, 0.04]                    |                        |
| Contempt              | <b>0.22***</b> [0.3, 0.49]       | <b>0.13***</b> [0.05, 0.12]   | <b>0.03</b> [0.01, 0.04]                     |                        |
| Fear                  | <b>0.24***</b> [0.3, 0.47]       | <b>-0.1***</b> [-0.12, -0.04] | <b>-0.02</b> [-0.04, -0.01]                  | -0.01 [-0.05, 0.07]    |

Note. The coefficients are standardised. \*  $p < 0.05$ , \*\*  $p < 0.01$ , \*\*\*  $p < 0.001$ . Covariates include past event participation, environmental concern, environmental movement identification, political efficacy, identity consolidation efficacy and participative efficacy, and experienced repression.

**Table 34: Mediation Analysis for Experienced Repression (IV) and Normative Action Intentions (DV) when Outrage is Removed from the Model**

| Path in <i>Process</i> model | (a) Effect of IV (I) on mediator | (b) Effect of mediator on DV | (c) Indirect effect of IV on DV via mediator | (d) Effect of IV on DV |
|------------------------------|----------------------------------|------------------------------|----------------------------------------------|------------------------|
| Mediator                     |                                  |                              |                                              |                        |
| Anger                        | -0.04 [-0.11, 0.02]              | <b>0.11**</b> [0.03, 0.13]   | -0.004 [-0.01, 0.003]                        |                        |
| Contempt                     | 0.03 [-0.05, 0.13]               | 0.04 [-0.01, 0.06]           | 0.001 [0.001, 0.005]                         |                        |
| Fear                         | <b>-0.07*</b> [-0.18, -0.02]     | 0.02 [-0.02, 0.05]           | -0.001 [-0.007, 0.003]                       | -0.05 [-0.1, 0.003]    |

Note. The coefficients are standardised. \*  $p < 0.05$ , \*\*  $p < 0.01$ , \*\*\*  $p < 0.001$ . Covariates include past event participation, environmental concern, environmental movement identification, political efficacy, identity consolidation efficacy and participative efficacy, and anticipated repression.

**Table 35: Mediation Analysis for Experienced Repression (IV) and Non-Normative Action Intentions (DV) when Outrage is Removed from the Model**

| Path in <i>Process</i> model | (a) Effect of IV (I) on mediator | (b) Effect of mediator on DV  | (c) Indirect effect of IV on DV via mediator | (d) Effect of IV on DV   |
|------------------------------|----------------------------------|-------------------------------|----------------------------------------------|--------------------------|
| Mediator                     |                                  |                               |                                              |                          |
| Anger                        | -0.04 [-0.11, 0.02]              | <b>0.08*</b> [0.01, 0.12]     | -0.003 [-0.009, 0.002]                       |                          |
| Contempt                     | 0.03 [-0.05, 0.13]               | <b>0.13***</b> [0.05, 0.12]   | 0.003 [-0.004, 0.01]                         |                          |
| Fear                         | <b>-0.07*</b> [-0.18, -0.02]     | <b>-0.1***</b> [-0.12, -0.04] | <b>0.007</b> [0.001, 0.02]                   | <b>0.33</b> [0.27, 0.38] |

Note. The coefficients are standardised. \*  $p < 0.05$ , \*\*  $p < 0.01$ , \*\*\*  $p < 0.001$ . Covariates include past event participation, environmental concern, environmental movement identification, political efficacy, identity consolidation efficacy and participative efficacy, and anticipated repression.

## Multiple Regression Models Across Age

**Table 36: Hierarchical Multiple Regression Model Comparing Predictors for Younger and Older Activists' Normative Collective Action Intentions**

| <b>Normative actions &lt; 63</b> |                | Model 1          |                | Model 2         |                | Model 3         |                 | Model 4         |       |                 |      |       |
|----------------------------------|----------------|------------------|----------------|-----------------|----------------|-----------------|-----------------|-----------------|-------|-----------------|------|-------|
| Variable                         | B              | SE (B) β         | B              | SE (B) β        | B              | SE (B) β        | B               | SE (B) β        |       |                 |      |       |
| (Constant)                       | <b>3.73***</b> | 0.08             | <b>2.03***</b> | 0.33            | <b>1.87***</b> | 0.35            | <b>1.95***</b>  | 0.35            |       |                 |      |       |
| Past Event Participation         | <b>0.27***</b> | 0.04             | 0.25           | <b>0.19***</b>  | 0.04           | 0.18            | <b>0.25***</b>  | 0.04            | 0.23  | <b>0.23***</b>  | 0.04 | 0.22  |
| Environmental Concern            |                |                  |                | <b>0.2**</b>    | 0.07           | 0.11            | <b>0.2**</b>    | 0.07            | 0.12  | <b>0.16*</b>    | 0.07 | 0.09  |
| Environmental Movement ID        |                |                  |                | <b>0.08*</b>    | 0.04           | 0.08            | <b>0.09*</b>    | 0.04            | 0.1   | <b>0.08*</b>    | 0.04 | 0.09  |
| Political Efficacy               |                |                  |                | 0.06            | 0.05           | 0.06            | 0.06            | 0.05            | 0.05  | 0.06            | 0.05 | 0.05  |
| Identity Consolidation Efficacy  |                |                  |                | <b>0.11*</b>    | 0.04           | 0.13            | <b>0.09*</b>    | 0.04            | 0.1   | 0.08            | 0.04 | 0.09  |
| Participative Efficacy           |                |                  |                | 0.02            | 0.03           | 0.03            | 0.03            | 0.03            | 0.04  | 0.03            | 0.03 | 0.04  |
| Anticipated Repression           |                |                  |                |                 |                |                 | 0.02            | 0.04            | 0.02  | -0.01           | 0.04 | -0.01 |
| Experienced Repression           |                |                  |                |                 |                |                 | <b>-0.13***</b> | 0.04            | -0.15 | <b>-0.13***</b> | 0.04 | -0.15 |
| Anger/Outrage                    |                |                  |                |                 |                |                 |                 |                 |       | <b>0.11**</b>   | 0.04 | 0.14  |
| Contempt                         |                |                  |                |                 |                |                 |                 |                 |       | -0.01           | 0.03 | -0.01 |
| Fear                             |                |                  |                |                 |                |                 |                 |                 |       | -0.004          | 0.03 | -0.01 |
| R <sup>2</sup>                   |                | 0.06             |                | 0.12            |                | 0.13            |                 | 0.14            |       |                 |      |       |
| F                                |                | <b>45.94***</b>  |                | <b>15.6***</b>  |                | <b>13.76***</b> |                 | <b>11.1***</b>  |       |                 |      |       |
| ΔR <sup>2</sup>                  |                | 0.06             |                | 0.06            |                | 0.02            |                 | 0.01            |       |                 |      |       |
| ΔF                               |                | <b>45.94***</b>  |                | <b>8.99***</b>  |                | <b>7.34***</b>  |                 | <b>3.57*</b>    |       |                 |      |       |
| <b>Normative actions &gt; 63</b> |                | Model 1          |                | Model 2         |                | Model 3         |                 | Model 4         |       |                 |      |       |
| Variable                         | B              | SE (B) β         | B              | SE (B) β        | B              | SE (B) β        | B               | SE (B) β        |       |                 |      |       |
| (Constant)                       | <b>3.24***</b> | 0.08             | <b>2.08***</b> | 0.33            | <b>1.95***</b> | 0.34            | <b>2.24***</b>  | 0.34            |       |                 |      |       |
| Past Event Participation         | <b>0.43***</b> | 0.04             | 0.41           | <b>0.32***</b>  | 0.04           | 0.31            | <b>0.32***</b>  | 0.05            | 0.3   | <b>0.3***</b>   | 0.05 | 0.28  |
| Environmental Concern            |                |                  |                | 0.04            | 0.06           | 0.03            | 0.03            | 0.06            | 0.02  | -0.06           | 0.07 | -0.03 |
| Environmental Movement ID        |                |                  |                | 0.08*           | 0.04           | 0.08            | 0.07            | 0.04            | 0.07  | 0.04            | 0.04 | 0.04  |
| Political Efficacy               |                |                  |                | 0.004           | 0.06           | 0.003           | 0.01            | 0.06            | 0.01  | 0.02            | 0.06 | 0.02  |
| Identity Consolidation Efficacy  |                |                  |                | <b>0.2***</b>   | 0.05           | 0.18            | <b>0.19***</b>  | 0.05            | 0.17  | <b>0.17**</b>   | 0.05 | 0.15  |
| Participative Efficacy           |                |                  |                | 0.08*           | 0.04           | 0.08            | 0.07            | 0.04            | 0.08  | 0.07            | 0.04 | 0.07  |
| Anticipated Repression           |                |                  |                |                 |                |                 | 0.05            | 0.04            | 0.05  | -0.01           | 0.04 | -0.01 |
| Experienced Repression           |                |                  |                |                 |                |                 | 0.03            | 0.04            | 0.03  | 0.03            | 0.04 | 0.03  |
| Anger/Outrage                    |                |                  |                |                 |                |                 |                 |                 |       | <b>0.15***</b>  | 0.04 | 0.2   |
| Contempt                         |                |                  |                |                 |                |                 |                 |                 |       | 0.01            | 0.03 | 0.02  |
| Fear                             |                |                  |                |                 |                |                 |                 |                 |       | -0.01           | 0.03 | -0.01 |
| R <sup>2</sup>                   |                | 0.17             |                | 0.21            |                | 0.21            |                 | 0.24            |       |                 |      |       |
| F                                |                | <b>123.18***</b> |                | <b>28.49***</b> |                | <b>21.68***</b> |                 | <b>18.71***</b> |       |                 |      |       |
| ΔR <sup>2</sup>                  |                | 0.17             |                | 0.05            |                | 0.003           |                 | 0.03            |       |                 |      |       |
| ΔF                               |                | <b>123.18***</b> |                | <b>8.11***</b>  |                | 1.21            |                 | <b>8.61***</b>  |       |                 |      |       |

Note. \* p < .05, \*\* p < .01, \*\*\* p < .001.

**Table 37: Hierarchical Multiple Regression Model Comparing Predictors for Younger and Older Activists' Non-Normative Collective Action Intentions**

| <b>Non-Normative actions &lt; 63</b> |                  |        |      |                 |        |       |                 |        |       |                 |        |       |
|--------------------------------------|------------------|--------|------|-----------------|--------|-------|-----------------|--------|-------|-----------------|--------|-------|
| Variable                             | Model 1          |        |      | Model 2         |        |       | Model 3         |        |       | Model 4         |        |       |
|                                      | B                | SE (B) | β    | B               | SE (B) | β     | B               | SE (B) | β     | B               | SE (B) | β     |
| (Constant)                           | <b>1.62***</b>   | 0.09   |      | 0.71            | 0.4    |       | <b>0.84*</b>    | 0.41   |       | <b>0.83*</b>    | 0.41   |       |
| Past Event Participation             | <b>0.42***</b>   | 0.05   | 0.32 | <b>0.36***</b>  | 0.05   | 0.27  | <b>0.22***</b>  | 0.05   | 0.17  | <b>0.21***</b>  | 0.05   | 0.16  |
| Environmental Concern                |                  |        |      | 0.06            | 0.08   | 0.03  | 0.04            | 0.08   | 0.02  | 0.01            | 0.08   | 0.01  |
| Environmental Movement ID            |                  |        |      | 0.03            | 0.05   | 0.03  | -0.01           | 0.04   | -0.01 | -0.02           | 0.04   | -0.02 |
| Political Efficacy                   |                  |        |      | 0.05            | 0.06   | 0.04  | 0.05            | 0.06   | 0.04  | 0.05            | 0.06   | 0.04  |
| Identity Consolidation Efficacy      |                  |        |      | 0.05            | 0.05   | 0.04  | 0.09            | 0.05   | 0.09  | 0.08            | 0.05   | 0.07  |
| Participative Efficacy               |                  |        |      | <b>0.13***</b>  | 0.04   | 0.14  | <b>0.11**</b>   | 0.04   | 0.12  | <b>0.11**</b>   | 0.04   | 0.12  |
| Anticipated Repression               |                  |        |      |                 |        |       | 0.03            | 0.04   | 0.03  | 0.01            | 0.04   | 0.01  |
| Experienced Repression               |                  |        |      |                 |        |       | <b>0.35***</b>  | 0.04   | 0.32  | <b>0.34***</b>  | 0.04   | 0.31  |
| Anger/Outrage                        |                  |        |      |                 |        |       |                 |        |       | 0.06            | 0.05   | 0.06  |
| Contempt                             |                  |        |      |                 |        |       |                 |        |       | <b>0.07*</b>    | 0.03   | 0.1   |
| Fear                                 |                  |        |      |                 |        |       |                 |        |       | -0.06*          | 0.03   | -0.08 |
| R <sup>2</sup>                       | 0.1              |        |      | 0.13            |        |       | 0.22            |        |       | 0.23            |        |       |
| F                                    | <b>76.75***</b>  |        |      | <b>17.4***</b>  |        |       | <b>23.95***</b> |        |       | <b>19.12***</b> |        |       |
| ΔR <sup>2</sup>                      | 0.1              |        |      | 0.03            |        |       | 0.09            |        |       | 0.02            |        |       |
| ΔF                                   | <b>76.75***</b>  |        |      | <b>5.06***</b>  |        |       | <b>37.8***</b>  |        |       | <b>5.06**</b>   |        |       |
| <b>Non-normative actions &gt; 63</b> |                  |        |      |                 |        |       |                 |        |       |                 |        |       |
| Variable                             | Model 1          |        |      | Model 2         |        |       | Model 3         |        |       | Model 4         |        |       |
|                                      | B                | SE (B) | β    | B               | SE (B) | β     | B               | SE (B) | β     | B               | SE (B) | β     |
| (Constant)                           | <b>1.29***</b>   | 0.09   |      | 0.25            | 0.37   |       | 0.31            | 0.37   |       | 0.51            | 0.37   |       |
| Past Event Participation             | <b>0.5***</b>    | 0.04   | 0.43 | <b>0.38***</b>  | 0.05   | 0.33  | <b>0.27***</b>  | 0.05   | 0.23  | <b>0.27***</b>  | 0.05   | 0.23  |
| Environmental Concern                |                  |        |      | 0.01            | 0.07   | 0.004 | 0.02            | 0.07   | 0.01  | -0.02           | 0.07   | -0.01 |
| Environmental Movement ID            |                  |        |      | <b>0.16***</b>  | 0.04   | 0.14  | <b>0.11*</b>    | 0.04   | 0.09  | 0.08            | 0.04   | 0.07  |
| Political Efficacy                   |                  |        |      | -0.06           | 0.06   | -0.04 | -0.04           | 0.06   | -0.03 | -0.02           | 0.06   | -0.01 |
| Identity Consolidation Efficacy      |                  |        |      | <b>0.14*</b>    | 0.06   | 0.11  | <b>0.16**</b>   | 0.06   | 0.12  | <b>0.12*</b>    | 0.06   | 0.09  |
| Participative Efficacy               |                  |        |      | <b>0.1*</b>     | 0.04   | 0.09  | 0.07            | 0.04   | 0.06  | 0.07            | 0.04   | 0.07  |
| Anticipated Repression               |                  |        |      |                 |        |       | 0.04            | 0.04   | 0.03  | 0.003           | 0.04   | 0.003 |
| Experienced Repression               |                  |        |      |                 |        |       | <b>0.29***</b>  | 0.04   | 0.28  | <b>0.29***</b>  | 0.04   | 0.28  |
| Anger/Outrage                        |                  |        |      |                 |        |       |                 |        |       | <b>0.09*</b>    | 0.04   | 0.1   |
| Contempt                             |                  |        |      |                 |        |       |                 |        |       | <b>0.09**</b>   | 0.03   | 0.13  |
| Fear                                 |                  |        |      |                 |        |       |                 |        |       | <b>-0.12***</b> | 0.03   | -0.16 |
| R <sup>2</sup>                       | 0.18             |        |      | 0.22            |        |       | 0.28            |        |       | 0.31            |        |       |
| F                                    | <b>135.68***</b> |        |      | <b>28.83***</b> |        |       | <b>30.27***</b> |        |       | <b>25.84***</b> |        |       |
| ΔR <sup>2</sup>                      | 0.18             |        |      | 0.04            |        |       | 0.06            |        |       | 0.04            |        |       |
| ΔF                                   | <b>135.68***</b> |        |      | <b>6.28***</b>  |        |       | <b>27.12***</b> |        |       | <b>10.29***</b> |        |       |

Note. \* p < .05, \*\* p < .01, \*\*\* p < .001.

## Removal of Covariates, Indirect Effects

**Table 38: Mediation Analysis for Experienced Repression (IV) and Normative Action Intentions (DV) when Covariates are Removed from the Model**

| Path in Process model | (a) Effect of IV (I) on mediator | (b) Effect of mediator on DV | (c) Indirect effect of IV on DV via mediator | (d) Effect of IV on DV    |
|-----------------------|----------------------------------|------------------------------|----------------------------------------------|---------------------------|
| <b>Mediator</b>       |                                  |                              |                                              |                           |
| Outrage/Anger         | <b>0.08**</b> [0.03, 0.15]       | <b>0.28***</b> [0.16, 0.27]  | <b>0.02</b> [0.006, 0.04]                    |                           |
| Contempt              | <b>0.07**</b> [0.03, 0.2]        | 0.1 [-0.05, 0.03]            | -0.001 [-0.007, 0.004]                       |                           |
| Fear                  | -0.03 [-0.11, 0.04]              | -0.1 [-0.03, 0.04]           | -0.0002 [-0.003, 0.002]                      |                           |
|                       |                                  |                              |                                              | <b>0.05</b> [0.001, 0.09] |

Note. The coefficients are standardised. \*  $p < 0.05$ , \*\*  $p < 0.01$ , \*\*\*  $p < 0.001$ .

**Table 39: Mediation Analysis for Experienced Repression (IV) and Non-Normative Action Intentions (DV) when Covariates are Removed from the Model**

| Path in Process model | (a) Effect of IV (I) on mediator | (b) Effect of mediator on DV  | (c) Indirect effect of IV on DV via mediator | (d) Effect of IV on DV   |
|-----------------------|----------------------------------|-------------------------------|----------------------------------------------|--------------------------|
| <b>Mediator</b>       |                                  |                               |                                              |                          |
| Outrage/Anger         | <b>0.08**</b> [0.03, 0.15]       | <b>0.16***</b> [0.09, 0.2]    | <b>0.01</b> [0.003, 0.02]                    |                          |
| Contempt              | <b>0.07**</b> [0.03, 0.2]        | <b>0.1**</b> [0.03, 0.11]     | <b>0.008</b> [0.001, 0.02]                   |                          |
| Fear                  | -0.03 [-0.12, 0.04]              | <b>-0.1***</b> [-0.12, -0.04] | 0.003 [-0.003, 0.01]                         |                          |
|                       |                                  |                               |                                              | <b>0.41</b> [0.36, 0.46] |

Note. The coefficients are standardised. \*  $p < 0.05$ , \*\*  $p < 0.01$ , \*\*\*  $p < 0.001$ .

**Table 40: Mediation Analysis for Anticipated Repression (IV) and Normative Action Intentions (DV) when Covariates are Removed from the Model**

| Path in Process model | (a) Effect of IV (I) on mediator | (b) Effect of mediator on DV | (c) Indirect effect of IV on DV via mediator | (d) Effect of IV on DV |
|-----------------------|----------------------------------|------------------------------|----------------------------------------------|------------------------|
| <b>Mediator</b>       |                                  |                              |                                              |                        |
| Outrage/Anger         | <b>0.29***</b> [0.33, 0.47]      | <b>0.29***</b> [0.17, 0.28]  | <b>0.08</b> [0.06, 0.11]                     |                        |
| Contempt              | <b>0.24***</b> [0.34, 0.53]      | -0.004 [-0.04, 0.03]         | -0.002 [-0.02, 0.01]                         |                        |
| Fear                  | <b>0.25***</b> [0.32, 0.49]      | 0.01 [-0.03, 0.05]           | 0.003 [-0.01, 0.02]                          |                        |
|                       |                                  |                              |                                              | -0.04 [-0.09, 0.02]    |

Note. The coefficients are standardised. \*  $p < 0.05$ , \*\*  $p < 0.01$ , \*\*\*  $p < 0.001$ .

**Table 41: Mediation Analysis for Anticipated Repression (IV) and Non-Normative Action Intentions (DV) when Covariates are Removed from the Model**

| Path in <i>Process</i> model | (a) Effect of IV (I) on mediator | (b) Effect of mediator on DV   | (c) Indirect effect of IV on DV via mediator | (d) Effect of IV on DV |
|------------------------------|----------------------------------|--------------------------------|----------------------------------------------|------------------------|
| Mediator                     |                                  |                                |                                              |                        |
| Outrage/Anger                | <b>0.29***</b> [0.33, 0.47]      | <b>0.2***</b> [0.11, 0.24]     | <b>0.06</b> [0.03, 0.08]                     |                        |
| Contempt                     | <b>0.24***</b> [0.34, 0.54]      | <b>0.13***</b> [0.04, 0.13]    | <b>0.03</b> [0.01, 0.05]                     |                        |
| Fear                         | <b>0.25***</b> [0.32, 0.49]      | <b>-0.13***</b> [-0.15, -0.06] | <b>-0.03</b> [-0.05, -0.02]                  | 0.003 [-0.07, 0.07]    |

Note. The coefficients are standardised. \*  $p < 0.05$ , \*\*  $p < 0.01$ , \*\*\*  $p < 0.001$ .

## Multiple Regression Models Across Separate Experienced Repression Items

**Table 42: Hierarchical Multiple Regression Model Comparing Predictors for Collective Action Intentions with the Item Experienced Surveillance**

| <b>Normative actions</b>        |                | Model 1          |         | Model 2        |                 | Model 3 |                | Model 4         |         |                 |                 |       |
|---------------------------------|----------------|------------------|---------|----------------|-----------------|---------|----------------|-----------------|---------|-----------------|-----------------|-------|
| Variable                        | B              | SE (B)           | $\beta$ | B              | SE (B)          | $\beta$ | B              | SE (B)          | $\beta$ |                 |                 |       |
| (Constant)                      | <b>3.49***</b> | 0.06             |         | <b>1.98***</b> | 0.23            |         | <b>1.87***</b> | 0.25            |         | <b>2.06***</b>  | 0.25            |       |
| Past Event Participation        | <b>0.35***</b> | 0.03             | 0.33    | <b>0.26***</b> | 0.03            | 0.24    | <b>0.25***</b> | 0.03            | 0.24    | <b>0.23***</b>  | 0.03            | 0.22  |
| Environmental Concern           |                |                  |         | <b>0.13**</b>  | 0.05            | 0.08    | <b>0.13**</b>  | 0.05            | 0.07    | 0.05            | 0.05            | 0.03  |
| Environmental Movement ID       |                |                  |         | <b>0.08**</b>  | 0.03            | 0.08    | <b>0.08**</b>  | 0.03            | 0.08    | <b>0.06*</b>    | 0.03            | 0.06  |
| Political Efficacy              |                |                  |         | 0.07           | 0.04            | 0.06    | 0.07           | 0.04            | 0.06    | 0.07            | 0.04            | 0.06  |
| Identity Consolidation Efficacy |                |                  |         | <b>0.13***</b> | 0.04            | 0.13    | <b>0.13***</b> | 0.04            | 0.13    | <b>0.11**</b>   | 0.03            | 0.11  |
| Participative Efficacy          |                |                  |         | <b>0.05*</b>   | 0.02            | 0.06    | <b>0.05*</b>   | 0.02            | 0.06    | <b>0.05*</b>    | 0.02            | 0.06  |
| Anticipated Repression          |                |                  |         |                |                 |         | 0.04           | 0.03            | 0.04    | -0.01           | 0.03            | -0.01 |
| Experienced Surveillance        |                |                  |         |                |                 |         | 0.03           | 0.04            | 0.02    | 0.03            | 0.04            | 0.02  |
| Anger/Outrage                   |                |                  |         |                |                 |         |                |                 |         | <b>0.13***</b>  | 0.03            | 0.17  |
| Contempt                        |                |                  |         |                |                 |         |                |                 |         | 0.001           | 0.02            | 0.001 |
| Fear                            |                |                  |         |                |                 |         |                |                 |         | 0.01            | 0.02            | 0.02  |
| R <sup>2</sup>                  |                | 0.11             |         |                | 0.16            |         |                | 0.16            |         |                 | 0.19            |       |
| F                               |                | <b>148.76***</b> |         |                | <b>40.93***</b> |         |                | <b>31.02***</b> |         |                 | <b>26.63***</b> |       |
| $\Delta R^2$                    |                | 0.11             |         |                | 0.06            |         |                | 0.002           |         |                 | 0.03            |       |
| $\Delta F$                      |                | <b>148.76***</b> |         |                | <b>17.39***</b> |         |                | 1.23            |         |                 | <b>12.58***</b> |       |
| <b>Non-normative actions</b>    |                | Model 1          |         | Model 2        |                 | Model 3 |                | Model 4         |         |                 |                 |       |
| Variable                        | B              | SE (B)           | $\beta$ | B              | SE (B)          | $\beta$ | B              | SE (B)          | $\beta$ |                 |                 |       |
| (Constant)                      | <b>1.46***</b> | 0.07             |         | 0.42           | 0.28            |         | 0.3            | 0.29            |         | 0.38            | 0.28            |       |
| Past Event Participation        | <b>0.47***</b> | 0.03             | 0.37    | <b>0.38***</b> | 0.04            | 0.3     | <b>0.3***</b>  | 0.04            | 0.24    | <b>0.3***</b>   | 0.04            | 0.24  |
| Environmental Concern           |                |                  |         | 0.04           | 0.05            | 0.02    | 0.04           | 0.05            | 0.02    | 0.01            | 0.05            | 0.003 |
| Environmental Movement ID       |                |                  |         | <b>0.1**</b>   | 0.03            | 0.09    | <b>0.08*</b>   | 0.03            | 0.07    | 0.06            | 0.03            | 0.05  |
| Political Efficacy              |                |                  |         | 0.04           | 0.05            | 0.03    | 0.05           | 0.04            | 0.04    | 0.07            | 0.04            | 0.05  |
| Identity Consolidation Efficacy |                |                  |         | 0.05           | 0.04            | 0.04    | 0.06           | 0.04            | 0.05    | 0.03            | 0.04            | 0.03  |
| Participative Efficacy          |                |                  |         | <b>0.12***</b> | 0.03            | 0.12    | <b>0.11***</b> | 0.03            | 0.11    | <b>0.11***</b>  | 0.03            | 0.11  |
| Anticipated Repression          |                |                  |         |                |                 |         | 0.06           | 0.03            | 0.05    | 0.03            | 0.03            | 0.03  |
| Experienced Surveillance        |                |                  |         |                |                 |         | <b>0.37***</b> | 0.05            | 0.2     | <b>0.36***</b>  | 0.05            | 0.19  |
| Anger/Outrage                   |                |                  |         |                |                 |         |                |                 |         | 0.07*           | 0.03            | 0.07  |
| Contempt                        |                |                  |         |                |                 |         |                |                 |         | <b>0.1***</b>   | 0.02            | 0.14  |
| Fear                            |                |                  |         |                |                 |         |                |                 |         | <b>-0.09***</b> | 0.02            | -0.12 |
| R <sup>2</sup>                  |                | 0.14             |         |                | 0.17            |         |                | 0.21            |         |                 | 0.23            |       |
| F                               |                | <b>199.38***</b> |         |                | <b>43.25***</b> |         |                | <b>40.99***</b> |         |                 | <b>35.25***</b> |       |
| $\Delta R^2$                    |                | 0.14             |         |                | 0.04            |         |                | 0.04            |         |                 | 0.03            |       |
| $\Delta F$                      |                | <b>199.38***</b> |         |                | <b>10.49***</b> |         |                | <b>28.44***</b> |         |                 | <b>15.95***</b> |       |

Note. \* p < .05, \*\* p < .01, \*\*\* p < .001.

**Table 43: Hierarchical Multiple Regression Model Comparing Predictors for Collective Action Intentions with the Item Experienced Arrest**

| <b>Normative actions</b>        |                | Model 1          |         | Model 2        |                 | Model 3 |                | Model 4         |         |                 |                 |       |
|---------------------------------|----------------|------------------|---------|----------------|-----------------|---------|----------------|-----------------|---------|-----------------|-----------------|-------|
| Variable                        | B              | SE (B)           | $\beta$ | B              | SE (B)          | $\beta$ | B              | SE (B)          | $\beta$ |                 |                 |       |
| (Constant)                      | <b>3.49***</b> | 0.06             |         | <b>2.04***</b> | 0.23            |         | <b>1.87***</b> | 0.25            |         | <b>2.06***</b>  | 0.24            |       |
| Past Event Participation        | <b>0.35***</b> | 0.03             | 0.33    | <b>0.26***</b> | 0.03            | 0.24    | <b>0.28***</b> | 0.03            | 0.27    | <b>0.26***</b>  | 0.03            | 0.25  |
| Environmental Concern           |                |                  |         | <b>0.13**</b>  | 0.05            | 0.07    | <b>0.12**</b>  | 0.05            | 0.07    | 0.05            | 0.05            | 0.03  |
| Environmental Movement ID       |                |                  |         | <b>0.08**</b>  | 0.03            | 0.08    | <b>0.08**</b>  | 0.03            | 0.08    | <b>0.06*</b>    | 0.03            | 0.06  |
| Political Efficacy              |                |                  |         | 0.06           | 0.04            | 0.05    | 0.06           | 0.04            | 0.05    | 0.06            | 0.04            | 0.05  |
| Identity Consolidation Efficacy |                |                  |         | <b>0.13***</b> | 0.03            | 0.13    | <b>0.12***</b> | 0.03            | 0.12    | <b>0.1**</b>    | 0.03            | 0.1   |
| Participative Efficacy          |                |                  |         | <b>0.06*</b>   | 0.02            | 0.07    | <b>0.06**</b>  | 0.02            | 0.07    | <b>0.06*</b>    | 0.02            | 0.07  |
| Anticipated Repression          |                |                  |         |                |                 |         | 0.04           | 0.03            | 0.04    | -0.01           | 0.03            | -0.01 |
| Experienced Arrest              |                |                  |         |                |                 |         | <b>-0.18**</b> | 0.06            | -0.08   | <b>-0.16**</b>  | 0.06            | -0.07 |
| Anger/Outrage                   |                |                  |         |                |                 |         |                |                 |         | <b>0.13***</b>  | 0.03            | 0.17  |
| Contempt                        |                |                  |         |                |                 |         |                |                 |         | 0.01            | 0.02            | 0.01  |
| Fear                            |                |                  |         |                |                 |         |                |                 |         | 0.01            | 0.02            | 0.01  |
| R <sup>2</sup>                  |                | 0.11             |         |                | 0.16            |         |                | 0.16            |         |                 | 0.19            |       |
| F                               |                | <b>153.65***</b> |         |                | <b>41.45***</b> |         |                | <b>32.63***</b> |         |                 | <b>27.91***</b> |       |
| $\Delta R^2$                    |                | 0.11             |         |                | 0.06            |         |                | 0.007           |         |                 | 0.02            |       |
| $\Delta F$                      |                | <b>153.65***</b> |         |                | <b>17.1***</b>  |         |                | <b>5.32**</b>   |         |                 | <b>12.93***</b> |       |
| <b>Non-normative actions</b>    |                | Model 1          |         | Model 2        |                 | Model 3 |                | Model 4         |         |                 |                 |       |
| Variable                        | B              | SE (B)           | $\beta$ | B              | SE (B)          | $\beta$ | B              | SE (B)          | $\beta$ |                 |                 |       |
| (Constant)                      | <b>1.47***</b> | 0.07             |         | 0.45           | 0.27            |         | 0.52           | 0.28            |         | <b>0.62*</b>    | 0.28            |       |
| Past Event Participation        | <b>0.46***</b> | 0.03             | 0.37    | <b>0.37***</b> | 0.04            | 0.29    | <b>0.28***</b> | 0.04            | 0.23    | <b>0.27***</b>  | 0.04            | 0.22  |
| Environmental Concern           |                |                  |         | 0.04           | 0.05            | 0.02    | 0.03           | 0.05            | 0.01    | -0.01           | 0.05            | -0.01 |
| Environmental Movement ID       |                |                  |         | <b>0.1**</b>   | 0.03            | 0.09    | <b>0.06*</b>   | 0.03            | 0.06    | 0.04            | 0.03            | 0.04  |
| Political Efficacy              |                |                  |         | 0.03           | 0.04            | 0.02    | 0.02           | 0.04            | 0.02    | 0.03            | 0.04            | 0.03  |
| Identity Consolidation Efficacy |                |                  |         | 0.07           | 0.04            | 0.06    | <b>0.1**</b>   | 0.04            | 0.08    | <b>0.08*</b>    | 0.04            | 0.07  |
| Participative Efficacy          |                |                  |         | <b>0.12***</b> | 0.03            | 0.12    | <b>0.11***</b> | 0.03            | 0.11    | <b>0.1***</b>   | 0.03            | 0.1   |
| Anticipated Repression          |                |                  |         |                |                 |         | 0.03           | 0.03            | 0.03    | 0.003           | 0.03            | 0.002 |
| Experienced Arrest              |                |                  |         |                |                 |         | <b>0.67***</b> | 0.07            | 0.25    | <b>0.66***</b>  | 0.07            | 0.25  |
| Anger/Outrage                   |                |                  |         |                |                 |         |                |                 |         | <b>0.08**</b>   | 0.03            | 0.09  |
| Contempt                        |                |                  |         |                |                 |         |                |                 |         | <b>0.09***</b>  | 0.02            | 0.13  |
| Fear                            |                |                  |         |                |                 |         |                |                 |         | <b>-0.08***</b> | 0.02            | -0.1  |
| R <sup>2</sup>                  |                | 0.13             |         |                | 0.17            |         |                | 0.22            |         |                 | 0.25            |       |
| F                               |                | <b>199.14***</b> |         |                | <b>43.62***</b> |         |                | <b>47.24***</b> |         |                 | <b>39.81***</b> |       |
| $\Delta R^2$                    |                | 0.13             |         |                | 0.04            |         |                | 0.06            |         |                 | 0.03            |       |
| $\Delta F$                      |                | <b>199.14***</b> |         |                | <b>10.98***</b> |         |                | <b>48.43***</b> |         |                 | <b>15.67***</b> |       |

Note. \* p < .05, \*\* p < .01, \*\*\* p < .001.

**Table 44: Hierarchical Multiple Regression Model Comparing Predictors for Collective Action Intentions with the Item Experienced Fines**

| <b>Normative actions</b>        |                |                  |         |                |                 |         |                 |                 |         |                 |                 |         |
|---------------------------------|----------------|------------------|---------|----------------|-----------------|---------|-----------------|-----------------|---------|-----------------|-----------------|---------|
| Variable                        | Model 1        |                  |         | Model 2        |                 |         | Model 3         |                 |         | Model 4         |                 |         |
|                                 | B              | SE (B)           | $\beta$ | B              | SE (B)          | $\beta$ | B               | SE (B)          | $\beta$ | B               | SE (B)          | $\beta$ |
| (Constant)                      | <b>3.5***</b>  | 0.06             |         | <b>2.03***</b> | 0.23            |         | <b>1.87***</b>  | 0.24            |         | <b>2.05***</b>  | 0.24            |         |
| Past Event Participation        | <b>0.34***</b> | 0.03             | 0.32    | <b>0.26***</b> | 0.03            | 0.24    | <b>0.28***</b>  | 0.03            | 0.26    | <b>0.26***</b>  | 0.03            | 0.24    |
| Environmental Concern           |                |                  |         | <b>0.13**</b>  | 0.05            | 0.07    | <b>0.12**</b>   | 0.05            | 0.07    | 0.05            | 0.05            | 0.03    |
| Environmental Movement ID       |                |                  |         | <b>0.08**</b>  | 0.03            | 0.08    | <b>0.08**</b>   | 0.03            | 0.08    | <b>0.06*</b>    | 0.03            | 0.06    |
| Political Efficacy              |                |                  |         | 0.06           | 0.04            | 0.05    | 0.06            | 0.04            | 0.05    | 0.06            | 0.04            | 0.05    |
| Identity Consolidation Efficacy |                |                  |         | <b>0.13***</b> | 0.03            | 0.13    | <b>0.12***</b>  | 0.03            | 0.12    | <b>0.11**</b>   | 0.03            | 0.11    |
| Participative Efficacy          |                |                  |         | <b>0.06*</b>   | 0.02            | 0.07    | <b>0.06*</b>    | 0.02            | 0.07    | <b>0.06*</b>    | 0.02            | 0.07    |
| Anticipated Repression          |                |                  |         |                |                 |         | 0.04            | 0.03            | 0.04    | -0.01           | 0.03            | -0.01   |
| Experienced Fines               |                |                  |         |                |                 |         | <b>-0.29***</b> | 0.08            | -0.1    | <b>-0.27***</b> | 0.08            | -0.09   |
| Anger/Outrage                   |                |                  |         |                |                 |         |                 |                 |         | <b>0.13***</b>  | 0.03            | 0.16    |
| Contempt                        |                |                  |         |                |                 |         |                 |                 |         | 0.01            | 0.02            | 0.01    |
| Fear                            |                |                  |         |                |                 |         |                 |                 |         | 0.004           | 0.02            | 0.01    |
| R <sup>2</sup>                  |                | 0.11             |         |                | 0.16            |         |                 | 0.17            |         |                 | 0.19            |         |
| F                               |                | <b>152.26***</b> |         |                | <b>41.3***</b>  |         |                 | <b>33.11***</b> |         |                 | <b>28.25***</b> |         |
| $\Delta R^2$                    |                | 0.11             |         |                | 0.06            |         |                 | 0.009           |         |                 | 0.02            |         |
| $\Delta F$                      |                | <b>152.26***</b> |         |                | <b>17.2***</b>  |         |                 | <b>7.34***</b>  |         |                 | <b>12.85***</b> |         |
| <b>Non-normative actions</b>    |                |                  |         |                |                 |         |                 |                 |         |                 |                 |         |
| Variable                        | Model 1        |                  |         | Model 2        |                 |         | Model 3         |                 |         | Model 4         |                 |         |
|                                 | B              | SE (B)           | $\beta$ | B              | SE (B)          | $\beta$ | B               | SE (B)          | $\beta$ | B               | SE (B)          | $\beta$ |
| (Constant)                      | <b>1.48***</b> | 0.07             |         | 0.48           | 0.27            |         | 0.46            | 0.28            |         | 0.54            | 0.28            |         |
| Past Event Participation        | <b>0.45***</b> | 0.03             | 0.36    | <b>0.36***</b> | 0.04            | 0.29    | <b>0.33***</b>  | 0.04            | 0.26    | <b>0.32***</b>  | 0.03            | 0.26    |
| Environmental Concern           |                |                  |         | 0.04           | 0.05            | 0.02    | 0.03            | 0.05            | 0.01    | -0.01           | 0.05            | -0.003  |
| Environmental Movement ID       |                |                  |         | <b>0.1**</b>   | 0.03            | 0.08    | 0.08*           | 0.03            | 0.07    | 0.05            | 0.03            | 0.05    |
| Political Efficacy              |                |                  |         | 0.03           | 0.04            | 0.02    | 0.03            | 0.04            | 0.02    | 0.04            | 0.04            | 0.03    |
| Identity Consolidation Efficacy |                |                  |         | 0.06           | 0.04            | 0.05    | 0.07            | 0.04            | 0.06    | 0.05            | 0.04            | 0.05    |
| Participative Efficacy          |                |                  |         | <b>0.12***</b> | 0.03            | 0.12    | <b>0.12***</b>  | 0.03            | 0.12    | <b>0.11***</b>  | 0.03            | 0.11    |
| Anticipated Repression          |                |                  |         |                |                 |         | 0.04            | 0.03            | 0.03    | 0.01            | 0.03            | 0.01    |
| Experienced Fines               |                |                  |         |                |                 |         | <b>0.66***</b>  | 0.09            | 0.19    | <b>0.64***</b>  | 0.09            | 0.18    |
| Anger/Outrage                   |                |                  |         |                |                 |         |                 |                 |         | <b>0.07*</b>    | 0.03            | 0.08    |
| Contempt                        |                |                  |         |                |                 |         |                 |                 |         | <b>0.09***</b>  | 0.02            | 0.13    |
| Fear                            |                |                  |         |                |                 |         |                 |                 |         | <b>-0.08***</b> | 0.02            | -0.11   |
| R <sup>2</sup>                  |                | 0.13             |         |                | 0.16            |         |                 | 0.2             |         |                 | 0.22            |         |
| F                               |                | <b>195.57***</b> |         |                | <b>42.86***</b> |         |                 | <b>40.5***</b>  |         |                 | <b>34.52***</b> |         |
| $\Delta R^2$                    |                | 0.13             |         |                | 0.04            |         |                 | 0.04            |         |                 | 0.03            |         |
| $\Delta F$                      |                | <b>195.57***</b> |         |                | <b>10.83***</b> |         |                 | <b>28.02***</b> |         |                 | <b>15.05***</b> |         |

Note. \* p < .05, \*\* p < .01, \*\*\* p < .001.

**Table 45: Hierarchical Multiple Regression Model Comparing Predictors for Collective Action Intentions with the Item Experienced Jail Time**

| <b>Normative actions</b>        |                |                  |      |                |                 |      |                |                 |       |                 |                 |       |
|---------------------------------|----------------|------------------|------|----------------|-----------------|------|----------------|-----------------|-------|-----------------|-----------------|-------|
| Variable                        | Model 1        |                  |      | Model 2        |                 |      | Model 3        |                 |       | Model 4         |                 |       |
|                                 | B              | SE (B)           | β    | B              | SE (B)          | β    | B              | SE (B)          | β     | B               | SE (B)          | β     |
| (Constant)                      | <b>3.49***</b> | 0.06             |      | <b>2.04***</b> | 0.23            |      | <b>1.93***</b> | 0.25            |       | <b>2.11***</b>  | 0.24            |       |
| Past Event Participation        | <b>0.35***</b> | 0.03             | 0.33 | <b>0.26***</b> | 0.03            | 0.24 | <b>0.26***</b> | 0.03            | 0.25  | <b>0.24***</b>  | 0.03            | 0.23  |
| Environmental Concern           |                |                  |      | <b>0.12**</b>  | 0.05            | 0.07 | <b>0.11*</b>   | 0.05            | 0.07  | 0.04            | 0.05            | 0.02  |
| Environmental Movement ID       |                |                  |      | <b>0.08**</b>  | 0.03            | 0.08 | <b>0.08**</b>  | 0.03            | 0.08  | <b>0.06*</b>    | 0.03            | 0.06  |
| Political Efficacy              |                |                  |      | 0.06           | 0.04            | 0.05 | 0.06           | 0.04            | 0.05  | 0.06            | 0.04            | 0.05  |
| Identity Consolidation Efficacy |                |                  |      | <b>0.14***</b> | 0.03            | 0.14 | <b>0.13***</b> | 0.03            | 0.13  | <b>0.12***</b>  | 0.03            | 0.11  |
| Participative Efficacy          |                |                  |      | <b>0.06*</b>   | 0.02            | 0.07 | <b>0.06*</b>   | 0.02            | 0.07  | <b>0.05*</b>    | 0.02            | 0.06  |
| Anticipated Repression          |                |                  |      |                |                 |      | 0.04           | 0.03            | 0.04  | -0.01           | 0.03            | -0.01 |
| Experienced Jail Time           |                |                  |      |                |                 |      | -0.34          | 0.2             | -0.04 | -0.3            | 0.2             | -0.04 |
| Anger/Outrage                   |                |                  |      |                |                 |      |                |                 |       | <b>0.13***</b>  | 0.03            | 0.17  |
| Contempt                        |                |                  |      |                |                 |      |                |                 |       | 0.003           | 0.02            | 0.01  |
| Fear                            |                |                  |      |                |                 |      |                |                 |       | 0.01            | 0.02            | 0.01  |
| R <sup>2</sup>                  |                | 0.11             |      |                | 0.16            |      |                | 0.16            |       |                 | 0.18            |       |
| F                               |                | <b>153.52***</b> |      |                | <b>41.46***</b> |      |                | <b>31.75***</b> |       |                 | <b>27.15***</b> |       |
| ΔR <sup>2</sup>                 |                | 0.11             |      |                | 0.06            |      |                | 0.003           |       |                 | 0.02            |       |
| ΔF                              |                | <b>153.52***</b> |      |                | <b>17.13***</b> |      |                | 2.37            |       |                 | <b>12.59***</b> |       |
| <b>Non-normative actions</b>    |                |                  |      |                |                 |      |                |                 |       |                 |                 |       |
| Variable                        | Model 1        |                  |      | Model 2        |                 |      | Model 3        |                 |       | Model 4         |                 |       |
|                                 | B              | SE (B)           | β    | B              | SE (B)          | β    | B              | SE (B)          | β     | B               | SE (B)          | β     |
| (Constant)                      | <b>1.48***</b> | 0.07             |      | 0.49           | 0.27            |      | 0.33           | 0.29            |       | 0.42            | 0.28            |       |
| Past Event Participation        | <b>0.45***</b> | 0.03             | 0.36 | <b>0.36***</b> | 0.04            | 0.29 | <b>0.36***</b> | 0.04            | 0.29  | <b>0.35***</b>  | 0.03            | 0.28  |
| Environmental Concern           |                |                  |      | 0.03           | 0.05            | 0.02 | 0.03           | 0.05            | 0.02  | 0.003           | 0.05            | 0.001 |
| Environmental Movement ID       |                |                  |      | <b>0.1**</b>   | 0.03            | 0.09 | <b>0.09**</b>  | 0.03            | 0.08  | <b>0.07*</b>    | 0.03            | 0.06  |
| Political Efficacy              |                |                  |      | 0.03           | 0.04            | 0.02 | 0.02           | 0.04            | 0.02  | 0.03            | 0.04            | 0.03  |
| Identity Consolidation Efficacy |                |                  |      | 0.07           | 0.04            | 0.06 | 0.07           | 0.04            | 0.06  | 0.05            | 0.04            | 0.04  |
| Participative Efficacy          |                |                  |      | <b>0.12***</b> | 0.03            | 0.12 | <b>0.12***</b> | 0.03            | 0.12  | <b>0.11***</b>  | 0.03            | 0.11  |
| Anticipated Repression          |                |                  |      |                |                 |      | 0.05           | 0.03            | 0.04  | 0.02            | 0.03            | 0.02  |
| Experienced Jail Time           |                |                  |      |                |                 |      | <b>1***</b>    | 0.24            | 0.11  | <b>0.97***</b>  | 0.23            | 0.11  |
| Anger/Outrage                   |                |                  |      |                |                 |      |                |                 |       | <b>0.07*</b>    | 0.03            | 0.08  |
| Contempt                        |                |                  |      |                |                 |      |                |                 |       | <b>0.09***</b>  | 0.02            | 0.14  |
| Fear                            |                |                  |      |                |                 |      |                |                 |       | <b>-0.09***</b> | 0.02            | -0.12 |
| R <sup>2</sup>                  |                | 0.13             |      |                | 0.16            |      |                | 0.17            |       |                 | 0.2             |       |
| F                               |                | <b>193.11***</b> |      |                | <b>42.64***</b> |      |                | <b>35.15***</b> |       |                 | <b>30.6***</b>  |       |
| ΔR <sup>2</sup>                 |                | 0.13             |      |                | 0.04            |      |                | 0.01            |       |                 | 0.03            |       |
| ΔF                              |                | <b>193.11***</b> |      |                | <b>11.05***</b> |      |                | <b>10.73***</b> |       |                 | <b>15.34***</b> |       |

Note. \* p < .05, \*\* p < .01, \*\*\* p < .001.

## References

- 1 Hayes, G., Doherty, B. & Saunders, C. A new climate movement?: Extinction rebellion's activists in profile. (Guildford: Centre for the Understanding of Sustainable Prosperity., 2020).
- 2 Saunders, C., Doherty, B., Hayes, G., Cammiss, S., & Walker, N. (2024). *Who Participated in The Big One? A Profile of Participants in Extinction Rebellion's 2023 Actions*. (pp. 1-27). (HASS Cornwall Working Papers; No. 1). [https://hass-cornwall.exeter.ac.uk/v8media/facultysites/hass/hasscornwall/XR\\_Report\\_-\\_Final\\_Draft\\_\(PDF\)\\_4-compressed.pdf](https://hass-cornwall.exeter.ac.uk/v8media/facultysites/hass/hasscornwall/XR_Report_-_Final_Draft_(PDF)_4-compressed.pdf)
- 3 Fisher, D. R. & Nasrin, S. Climate activism and its effects. *Wiley Interdisciplinary Reviews: Climate Change* **12**, e683 (2021). <https://doi.org/10.1002/wcc.683>
